# Supplementary material for: Genome-wide identification, evolutionary relationship and expression analysis of AGO, DCL and RDR family genes in tea
Source: PubMed Central journal article supplement (PMC8060290; doi:10.1038/s41598-021-87991-5), 2021-04-21
Supplement: 41598_2021_87991_MOESM1_ESM.pdf [file 41598_2021_87991_MOESM1_ESM.pdf]

**Genome-wide identification, evolutionary relationship and expression analysis of AGO, DCL and RDR family genes in tea**

**Debasish B. Krishnatreya<sup>1</sup>, Pooja Moni Baruah<sup>1</sup>, Bhaskar Dowarah<sup>1</sup>, Soni Chowrasia<sup>2</sup>, Tapan Kumar Mondal<sup>2</sup>, Niraj Agarwala<sup>1\*</sup>**

1. Department of Botany, Gauhati University, Jalukbari, Guwahati, Assam, 781014, India.

2. ICAR-National Institute for Plant Biotechnology, LBS building, Pusa, IARI, New Delhi-110012, India.

\*Correspondence to: niraj\_botany@gauhati.ac.in

**Supplementary Figure S1-a. Multiple Sequence alignment of CsAGO proteins:** The names of the identified CsAGO genes are indicated to the left of the alignments. The length of the alignment is shown on the top, while the length of each protein is given on the right. Conserved consensus residues are shown at the bottom. Invariable residues conserved at 100% are highlighted in red, those conserved at >80% are shown in yellow and residues that are >60% conserved are highlighted in green. The sequences were aligned using ClustalX and viewed by GeneDoc.

```

*      20      *      40      *      60      *
CsAGO2/3f : -----MNPHEHLETLVHLHCP-----LFIQDCPLLSLNSQTP-----TQSR : 36
CsAGO2/3d : ----- : -
CsAGO7 : -----MEETEEANTTKKCTP----- : 15
CsAGO10a : ----- : -
CsAGO2/3a : -----MERDGGRRYNRGRGGAAPRRSGGD----- : 24
CsAGO2/3b : -----MERDGGRRYNRGRGGAALPRSGDGGNR : 28
CsAGO6 : ----- : -
CsAGO4c : ----- : -
CsAGO4a : ----- : -
CsAGO4b : ----- : -
CsAGO2/3c : -----MERDG-RNYNRG-----APRGASCG----- : 19
CsAGO10b : ----- : -
CsAGO10c : ----- : -
CsAGO1 : MFGKDEKRRKRGRKLLVEADLAALAYLTDQGWYKSGFEIYILLASLYSFLSGSIASLGFSLLPSENGF : 72
CsAGO5c : -----MGRLRLWLGEREDDKNKGFRFRSPARERRGGWWSVVVGVATAVVIAREERD : 51
CsAGO5a : ----- : -
CsAGO5b : ----- : -
CsAGO2/3e : -----MGYDDYIEKKVEVVSNPCDEVGFTHPSQFVMLNNEEAGGPLPSSVGMQLQSE : 51

```

```

80      *      100      *      120      *      140
CsAGO2/3f : FHGLNALESEEEPTADELLMVVVAVVTEEFLSFS-----LPRYQTHNHHHHYHGGQGGGGTYT : 98
CsAGO2/3d : -----MERSNYGRGGGGGGRRGG : 22
CsAGO7 : -----KTRSFGRNRP-----NHHHHHHYHQQQQQQLLQ----- : 47
CsAGO10a : -----MPMRQMKIIP-----EQHLVIKPQLQNSMNQHLVIFQLQNSMNQVHK----- : 43
CsAGO2/3a : --RGGNGGGGRGRGQGGGGRRGARAWPSEQSNQGGQ--GGGGGRGGGARAWFPQQGQNGGGGGGGG-- : 89
CsAGO2/3b : GGRGGNGGGGRGRGQGGGGRRGARAWPSELSQNGQCGGGGGGGRRGARAWAPPQQGQNGGGGGGGGG : 100
CsAGO6 : ----- : -
CsAGO4c : ----- : -
CsAGO4a : ----- : -
CsAGO4b : -----MMIMMATVTMAATAEGVAVKFPFMKAINPNLTLNRTS----- : 38
CsAGO2/3c : ---GGSGSGRGRGRG---RAWGSPSQGQNGGGGRGQ--- : 50
CsAGO10b : -----MPMRQMKIIP-----EQHLVIKPQLQ-----TMNQAK----- : 29
CsAGO10c : -----MPHWQKPEP-----QRHVISRRLQD-----SMHQSL----- : 29
CsAGO1 : PVRASGIIMVRRKRETELPGGSESSQEAASGGRRGGAQRPPAQQQQQQQGGGGHGGGRGWGQSQGGRR : 144
CsAGO5c : EKKYSRRRTEREREREREGRGHRG-----VQSSMSTRGRGR-----GDGGGRGRGRQPRRDQ-- : 105
CsAGO5a : -----MSGRGRGR-----GRG-----GRGQPRHDR----- : 20
CsAGO5b : -----MSGRNRGRSGSV-----GGDGGGRGRAQPRRTL----- : 29
CsAGO2/3e : DRVLGSRVSKVNPSETVFWCRDHKLGISTQVLLPLYNVAKQTFMAALERYKIHSNLSVKKDESGSDNMSSWY : 123

```

```

*      160      *      180      *      200      *
CsAGO2/3f : AT-----LQPPQPPQGWGRPVQGRGPMRPPPR----- : 129
CsAGO2/3d : GG-----GGRGSVDR----- : 32
CsAGO7 : -----QSNRIGYCFNQNQYTPALLPLP----- : 71
CsAGO10a : -----PPKTAQNGKGFPTTHSQNTELHNQFPLPSKNRGR----- : 77
CsAGO2/3a : -----ARGWGPSQSGGQPVWDRVAVQGGPVGGGGGACRP : 123
CsAGO2/3b : GG-----ARAWGPSQSGQVWDRVAVQGGPVGGGGG-AYRP : 135
CsAGO6 : -----MEKEAVGSRRLPPP----- : 15
CsAGO4c : -----MDTFEKDNGTTESLPPP----- : 18
CsAGO4a : -----MEFPG-----ETDVLPPP----- : 14
CsAGO4b : -----ITILVLMYSFVSGSMALSFDLMDSFHDGNGATEALPPP----- : 77
CsAGO2/3c : -----VRAWGPSQSGGQWGP----- : 66
CsAGO10b : -----PPKTAQNGKGFPTTQEPQNTKIYNQTSPPSKNRGR----- : 63
CsAGO10c : -----SQESSEDAN-----KIEGSRGR----- : 47
CsAGO1 : GYGRGGGGGGGGPQRGGMAGQQYVGGPEYHQGRGGPRGGVSVQRGGSSSSVGGGLGVVPSA---GG : 213
CsAGO5c : -----PPPPSSGRGGGRGTAGGSAPYQAAPPQRP-- : 140
CsAGO5a : -----PSPASSSGRGGNHIIPPPASFQPALSSPTP----- : 55
CsAGO5b : -----PSP---AVQGRGRGGAG-PAPTQAPPPTVSQPP----- : 60
CsAGO2/3e : ASSLDVLESEVMKHSRALLLLSCDFGTWVNSRRLRSPSAVVAQAQQQSLSRKGGSSSSSSNSTVISGP : 195

```

```

220      *      240      *      260      *      280
CsAGO2/3f : VRPTRQDSGEISDRGRGRIPGRRGSGRACQPAP----APRTQSLSSPEPPRFR---PDFQILEQPPASSL : 193
CsAGO2/3d : -----QYQGGGRRGGDPSIP-----DISSL : 52
CsAGO7 : PIMPLQLTVPPLPQNQTFRSKTHLQKHPWKQNNPLATSSDPEPQNSAVSPAPEGLGRQPGIPFRGKDGRR : 143
CsAGO10a : -----RRGKGGKPDNSDVMRPSLRPAS--VQPTGAFEADIPNGSRSRN-----SCVER : 126
CsAGO2/3a : PAPLQQVQGVGPTSGVWSGRPWSG---QSSSQ--PPIQVVPVQKLEQALPDIKELEISEKKPSPAII : 188
CsAGO2/3b : PAPLQQVQGVGPTSGVWSGRPWSGSPVAGQSSSQ--PPIQVVPVQKLEQALPDIRQLQISEKKPSSSI : 205
CsAGO6 : -----PIIPPTVKPEKLVTPERS----- : 33
CsAGO4c : -----PPVPADVPMRA-EADNAPEPVKN----- : 41
CsAGO4a : -----PEIPPDIDPIRVQEPEDVPEFTKTS----- : 40
CsAGO4b : -----PVPVNIIVLQA-EPDHAPPEVVK----- : 100
CsAGO2/3c : ---QQGQ-----GVWSGRPWIGQ--SSSSSQT--HQIQTVVPHRFPPEQLLPDVQSLSEIKKPKQLSI : 122
CsAGO10b : -----RRRGGGRKSDQGEVFMRPSRPTGVHKPARAGETDIPNGSVNGAN-----LCEVEM : 116
CsAGO10c : -----RRSAKGSK-----METAHNVKPEIFN-----VEP : 71
CsAGO1 : PSRPVPELHQATQASYQAGVTTQPVAYPKPAEMHGEASSSSPVPDPSLQVTSKVQGLSLQEGTSSQAIQ : 285
CsAGO5c : -----YASTSTPSSSQPPPTS-----SSLSQDVERKLIQSPPTTAAQPPSSSVQRPA-QPPLPAQDPAQ : 201
CsAGO5a : -----LASSASLSDMQLLKT--LQSPAPQALTLPEVQVTPPP-----PQSVKEAVQ : 101
CsAGO5b : -----VVSHSPSPSQAQSSSTTRTEVSSLSQDVESKLSMQTSPS-----PVQMTV : 106
CsAGO2/3e : TRIVYREALNESSEDLNLPFWQLEGTPTLPAFGCLGKYARGQSLLNKLETCPFNIPDFQILEQPPASSL : 267

```

```

*      300      *      320      *      340      *      360
CsAGO2/3f : PR-TKENNIVLVRPDPKCGTHSIQSPKLVNHFVPMFNAKTTIHYIYDIDKEEVPKNSRPAK---IQKSHLRM : 262
CsAGO2/3d : KI-SSGNLLVVRPDPICGTLAIQSPKSVNHFVPRFNEKTTIHYDIDIKEDVSSKSRPAR---VSKSVLSM : 121
CsAGO7 : VMGTPQSLVVRPDPSCGVEGAVIS-FLNHFLLVQDFDPSHRTFHYDVTITPEVAS---SKVAFR : 203
CsAGO10a : GFPSSSKLSCAHPRGFC--QLGTCVVKANHFFAEL-PDKDLHQYDVTITPEVAS---RAVNAI : 186
CsAGO2/3a : LG-SSGKVVEMKRPDDCGTLAFRNTRFLANHFVVKFNQPSIMHYDVIDIKENMPPGSRRAKRPISKSDLRL : 259
CsAGO2/3b : PGGSSSKLIVPKPDDCGTLAFRNTRFLANHFVVKFNQPSIMHYDVIDIKENMPPGSRRAKRPISKSDLRL : 277
CsAGO6 : -----IISRRGFC--SAGRRIISLTHNHEKVVV-KSPNEIFYQYSSVSSSEDKRVEEN---KGIGRRI : 89
CsAGO4c : -----KAVRVPMAARRGVC--SKGRIPILTNHKEKVVN-TNVS-----VSYEDGRPVVDG---KGAGRRV : 93
CsAGO4a : -----EPKRVPMARRGVC--SKGRIPILTNHKEKVVN-TNVDGHHFHYSSVSYEDGRPVVDG---KGIGRRI : 101
CsAGO4b : -----KVMRVPMTARRGVC--SKGRIPILTNHKEKVVN-TNVDGHHFHYSSVSYEDGRPVVDG---KGVGRKV : 161
CsAGO2/3c : PE-SSDKRIVLIRPDRCGTLAVRSTRFLANHFVRFNPESTIMHYNDIKENMPPGSRRAKRPISKSDLRL : 193
CsAGO10b : GFPSSSKLSFAPRPGVC--QLGTCVVKANHFFAEL-PDKDLHQYDVTITPEVAS---RNVNAI : 176
CsAGO10c : --PPSNKSLVLRPFGVC--QLGTCVVKANHFFAEL-SEGDLTQYSVKILPEVNS-----TILNKAI : 129
CsAGO1 : PAPPSSKSMRFLRPGRC--SSGTCTVVKANHFFAEL-PDKDLHQYDVTITPEVAS---RGVNAI : 345
CsAGO5c : PP-LSTKSLRFPARPGVC--TVGRCTVVKANHFLLVDV-ADRDLLHYDVTITPEVAS---KVVCRRI : 260
CsAGO5a : PPPASKAVRFPARPGVC--TAGRCVVRANHFVMSV-----ITPEVTS-----KLLHREI : 149
CsAGO5b : LP-SSSKSLRFPARPGVC--TIGRCVVRANHFLLVDV-ANKDLLHYDVTITPEVAS---KVVCRRI : 165
CsAGO2/3e : PR-TKENNIVLVRPDPKCGTHSIQSPKLVNHFVPMFNAKTTIHYIYDIDKEEVPKNSRPAK---IQKSHLRM : 336

```

Rp G 6 NHF v 6

CsAGO2/3f : **T**KDK**L**FSD**DP**SQ**F**PL**S**ST**A**Y**D**CG**D**KN**L**F**S**AV**E**LE**T**E-----**K**K**K**F**S**D**G**G**E**G**M**K----- : 311  
CsAGO2/3d : **V**KDK**L**FSD**DP**QA**F**PL**S**RT**A**Y**D**CG**R**KN**L**F**S**AV**P**LE**T**G-----**T**K**V**D**F**S**G**E**D**DM**K**S----- : 170  
CsAGO7 : **I**KQ**L**VE**D**NS**V**W**S**GA**L**P**V**Y**D**GR**K**NS**V**PM**E**FQ**S**DR**L**EFF**I**CL**P**IP**S**SK**L**I**S**PR**S**VD**S**Q----- : 264  
CsAGO10a : **M**AE**L**V**K**LY**K**ES**D**IG**K**RL**P**A**Y**D**G**R**K**NS**L**Y**T**AG**E**LP**F**AW**K**-----**F**NI**K**L**V**DE**E**D**G**----- : 235  
CsAGO2/3a : **I**TDK**L**FSD**DP**TR**F**PE**L**IST**Y**D**G**E**K**NI**F**SA**V**PL**T**G-----**T**F**V**EL**S**GG**E**D**T**AP----- : 308  
CsAGO2/3b : **I**TDK**L**FSD**DP**TR**F**PE**L**IST**Y**D**G**E**K**NI**F**SA**V**PL**T**G-----**T**F**V**EL**S**GG**E**D**T**AP----- : 326  
CsAGO6 : **I**DK**L**Y**Q**Y**I**-**S**SE**L**AG**K**K**F**A**Y**D**E**CK**S**L**T**Y**T**CG**L**P**L**Q**N**IS-----**E**FT**V**LE**S**FA**K**-----**R**GS**P**PH : 143  
CsAGO4c : **E**RV**H**E**H**E**Y**-**D**TE**L**AG**K**D**F**A**Y**D**E**CK**S**L**T**IC**L**P**L**RN**K**L-----**E**FT**V**LE**D**V**S**-----**N**R**N**NG**R**SP**G** : 150  
CsAGO4a : **I**DK**V**H**E**H**E**Y**-E**SE**L**AG**K**D**F**A**Y**D**E**CK**S**L**T**Y**T**CG**L**P**L**RN**K**M-----**E**FT**V**LE**D**V**S**PK**S**F**G**S**K**T**N**G**S**GS**P**GG : 163  
CsAGO4b : **I**DR**V**H**E**H**E**Y**-D**TE**L**AG**K**D**F**A**Y**D**E**CK**S**L**T**Y**T**CG**L**P**L**RN**K**L-----**E**FT**V**LE**D**IS**S**-----**N**R**N**NG**R**SP**G** : 218  
CsAGO2/3c : **T**RE**K**L**F**S**D**DP**TR**F**PE**Q**S**A**Y**D**G**E**K**NI**F**S**A**MP**L**PE**G**-----**N**S**V**V**L**S**G**G**E**D**V**AS----- : 242  
CsAGO10b : **M**AE**L**V**K**LY**K**ES**D**IG**K**RL**P**A**Y**D**G**R**K**NS**L**Y**T**AG**E**LP**F**AW**K**-----**F**NI**K**L**V**DE**E**D**G**----- : 225  
CsAGO10c : **M**AQ**L**V**K**L**H**R**D**T**D**L**G**R**M**L**P**V**Y**D**G**R**G**A**L**Y**T**AG**L**M**P**FT**L**K-----**K**F**T**I**L**AD**G**DE**S**----- : 178  
CsAGO1 : **M**EQ**L**V**K**MY**R**ES**H**L**G**K**R**L**P**A**Y**D**G**R**K**NS**L**Y**T**AG**L**P**L**FT**S**K-----**E**F**K**T**I**L**D**E**D**D**G**----- : 394  
CsAGO5c : **V**NAL**I**A**Y**Q**E**S**H**L**G**K**R**C**P**A**Y**D**G**R**K**NS**L**Y**T**AG**L**P**L**F**V**S**Q**-----**D**F**V**K**L**VER**E**T----- : 308  
CsAGO5a : **I**N**K**L**V**E**L**Y**R**ES**H**L**G**K**R**L**A**Y**D**GR**K**NS**L**Y**T**AG**L**P**L**F**S**SK-----**D**E**V**I**K**L**V**D**Q**D**R**----- : 197  
CsAGO5b : **I**SEL**I**A**Y**R**S**ES**H**L**G**K**R**L**A**Y**D**GR**K**NS**L**Y**T**AG**L**P**L**F**I**SK-----**D**E**V**I**K**L**V**D**K**Y**D**----- : 213  
CsAGO2/3e : **T**KDK**L**FSD**DP**SQ**F**PL**S**ST**A**Y**D**CG**D**KN**L**F**S**AV**E**LE**T**E-----**K**K**K**F**S**D**G**E**G**M**K**----- : 385

6 aYDG 653 p 1

CsAGO2/3f : -----**V**S**I**V**I**T**I**E**V**K**K**L**R**F**G**K**D****V**Y**S**G-----**E**IM**S**I**F**RD**I**L**G****M**D**L**V**K**R**N**P**S**R**E**-**R**I : 361  
CsAGO2/3d : -----**S**S**T**V**T**I**H**V**N**E**L**E**L**G**K**L**K**E**M**S**G**-----**K**V**L**S**T**PR**D**V**L****G**M**D**L**V**M**K**R**N**P**S**R**H**-**R**I : 220  
CsAGO7 : -----**E**M**H**P**Q**L**K**L**R**I**N**I**K**L**R**I**G**F**F**Q**S**L**R**E**T**Q**Q**G**L**A**L**N**D**V**S**V**T**A**H**E**S**I**G**V**I**A**Y**L**Q**K**R**L**E**F**L**C**D**L**S**Q**R** : 323  
CsAGO10a : -----**T**NG**P**K**R**V**R**E**K**V**V**I**F**A**R**A**N**L**H**L**G**Q**F**TA**G**-----**K**R**A**D**A**F**O**A**L****O**L**D**I**V**I**R**L**A**T**K**R**-**Y**C** : 292  
CsAGO2/3a : -----**R**S**M**R**F**A**E**L**V**N**E**L**K**L**S**K**L**N**A**V**R**G-----**M**L**S**Y**V**R**D**V**F****G**M**D**L**V**M**K****N**P**S**R**H**-**M**L : 358  
CsAGO2/3b : -----**R**S**M**R**F**A**E**L**V**N**E**L**K**L**S**K**L**N**D**V**R**G-----**M**L**S**Y**V**R**I**F**O****G**M**D**L**V**M**K****N**P**S**R**H**-**M**N : 376  
CsAGO6 : **N**G**S**P**S**E**S**-**K**R**S**K**R**F**Q**S**K**S**E**V**N**A**K**I**P**L**K**S**L**A**L**Q**G**-----**S**E**V**E**N**I**D**A**L**R**V**L**D**I**L**R**O**H**A**A**K**Q**G**C**L** : 211  
CsAGO4c : --**S**P**N**G**N**D**R**K**R**Q**R**R**P**Y**Q**S**K**T**S**V**E**I**S**F**A**A**K**I**P**Q**A**I**A**N**A**R**G**-----**H**E**S**E**N**S**O**A**L**R**V**L**D**I**L**R**O**H**A**A**K**Q**G**C**L** : 217  
CsAGO4a : --**S**P**N**G**N**E**S**D**R**K**L**R**R**A**F**Q**S**K**T****S**V**E**I**S**F**A**A**K**I**P**Q**A**I**A**N**A**R**G**-----**Q**E**S**E**N**S**O**A**L**R**V**L**D**I**L**R**O**H**A**A**K**Q**G**C**L** : 232  
CsAGO4b : --**S**P**N**E**N**D**R**K**R**Q**R**R**P**Y**Q**S**K**T**S**V**E**I**S**F**A**A**K**I**P**Q**A**I**A**N**A**R**G**-----**Q**E**S**E**N**S**O**A**L**R**V**L**D**I**L**R**O**H**A**A**K**Q**G**C**L** : 285  
CsAGO2/3c : -----**R**S**M**R**F**A**E**L**V**N**E**L**K**L**S**K**L**N**D**V**R**G-----**M**L**S**Y**I**F**R**D**I**L**G****M**D**L**V**M**K**N**P**S**Q**H**-**R**I : 292  
CsAGO10b : -----**I**NG**P**K**R**E**R**V**K**V**I**K**F**A**R**A**N**L**H**L**G**Q**F**TA**G**-----**K**R**A**D**A**F**O**A**L****O**L**D**I**V**I**R**L**A**T**K**R**-**Y**C** : 282  
CsAGO10c : -----**I**G**M**A**K**-**E**R**E****V**E**T**I**K**F**G**A**H**A**S**M**H**Q**L**R**E**L**S**G-----**K**Q**V**D**T**E**L**A**L****O**L**D**I**V**I**R**L**A**Q**R**-**Y** : 234  
CsAGO1 : -----**T**G**G**A**R**R**E**R**E**R**V**I**K**L**A**A**R**A**D**L**H**L**G**L**F**Q**G**-----**R**Q**A**D**A**F**O**A**L****O**L**D**I**V**I**R**L**A**T**K**R**-**Y**C** : 451  
CsAGO5c : -----**T**S**R**R**E**R**E**R**V**A**I**K**F**A**A**K**A**D**L**H**L**Q**Q**F**H**G-----**R**Q**L**D**V**F**O**R**T**I**O**V**L**D**V**I**R**L**A**T**K**R**-**Y**C** : 363  
CsAGO5a : -----**G**A**R**K**D**R**E**R**V**A**I**K**F**A**A**K**P**D**I**H**H**Q**E**F**R**G-----**R**Q**L**D**T**F**O**R**T**I**O**V**L**D**V**I**R**L**A**T**K**R**-**Y**C** : 252  
CsAGO5b : -----**Q**T**R**R**E**L**E**K**A**I**K**A**A**K**D**I**H**L**H**Q**E**F**R**G-----**R**Q**D**A**F**O**A**L**O**L**D**I**V**I**R**L**A**T**K**R**-**Y**T** : 268  
CsAGO2/3e : -----**V**S**I**V**I**T**I**E**V**K**K**L**R**F**G**K**D****V**Y**S**G-----**E**IM**S**I**F**RD**I**L**G****M**D**L**V**K**R**N**P**S**R**E**-**R**I : 435

5 I 6 6g p 6D66 4

CsAGO2/3f : **F**V**G**R**S**F**Y**P**T**T**S**N**K**D**D****L**D**G**C**V**T**A**S**K**G**F**Q**H**S**L**K**P**T**S**Q**G**L**A**L**C**L**D**Y**S**V**L**A**H**K**R**K**L**P**V**I**D**F**L**KE**H**V**G**F**K**Q**V**N**D**M : 433  
CsAGO2/3d : **C**A**G**R**G**F**Y**S**A**T**S**--**A**D**D****I**G**V**C**I**T**A**S**K**G**F**Q**H**S**L**K**P**T**S**Q**G**L**A**L**C**L**D**Y**S**V**L**A**H**K**R**K**L**P**V**I**D**F**L**KE**H**V**R**G**F**R**G**V**N**D**V** : 290  
CsAGO7 : **F**V**G**R**S**F**L**V**S**S**M**G**G**A**K****I**D**G**G**A**I**G**L**R**I**F**F**Q**S**L**R**E**T**Q**Q**G**L**A**L**N**D**V**S**V**T**A**H**E**S**I**G**V**I**A**Y**L**Q**K**R**L**E**F**L**C**D**L**S**Q**R : 395  
CsAGO10a : **F**V**G**R**S**F**S**P**D**I**R**K**P**Q**R****F**D**G**L**E**S**W**C**G**F**Y**Q**S**I**R**E**T**Q**Q**M**G**L**S**L**N**I**D**M**S**A**A**A**I**E**A**L**P**V**I**D**F**V**A**Q**L**-----**L**G**K**D**V** : 359  
CsAGO2/3a : **S**V**G**R**S**F**S**K**E**F**R**P**N**D**I**D**G**Y**I**A**A**F**R**G**S**Q**S**L**K**A**T**A**G**L**A**L**C**L**D**S**S**V**L**A**H**K**R**K**L**P**V**I**D**F**L**ME**-**Q**Q**F**G**-**L**N**D**V : 445  
CsAGO2/3b : **S**V**G**R**S**F**S**K**E**F**R**P**N**D**I**D**G**Y**I**A**A**F**R**G**S**Q**S**L**K**A**T**A**G**L**A**L**C**L**D**S**S**V**L**A**H**K**R**K**L**P**V**I**D**F**L**ME**-**Q**Q**F**G**-**L**N**D**V : 445  
CsAGO6 : **L**V**R**Q**S**F**H**D**S**R**N**F**A**D**V**G**G**V**L**G**C**R**G**H**S**F**R**T**Q**G**G**L**S**L**N**I**D**V**S**T**M**I**I****O**P**G**V**D**F**L**I**A**N-----**Q**N**V**K**D** : 284  
CsAGO4c : **L**V**R**Q**S**F**H**D**S**R**N**F**A**D**V**G**G**V**L**G**C**R**G**H**S**F**R**T**Q**G**G**L**S**L**N**I**D**V**S**T**M**I**I****O**P**G**V**D**F**L**I**A**N-----**Q**N**V**K**D** : 282  
CsAGO4a : **L**V**R**Q**S**F**H**D**S**R**N**F**A**D**V**G**G**V**L**G**C**R**G**H**S**F**R**T**Q**G**G**L**S**L**N**I**D**V**S**T**M**I**I****O**P**G**V**D**F**L**I**A**N-----**Q**N**V**K**D** : 352  
CsAGO2/3c : **S**V**G**R**S**F**S**K**E**F**R**P**R**D**I**D**G**Y**I**A**A**Y**R**G**F**Q**H**S**L**K**P**T**S**Q**G**L**A**L**C**L**D**Y**S**V**L**A**H**K**R**K**L**P**V**I**D**F**L**V**E**N**V**E**G**F**R**-**V**N**D**M : 363  
CsAGO10b : **F**V**G**R**S**F**S**P**D**I**R**K**P**Q**R****F**D**G**L**E**S**W**C**G**F**Y**Q**S**I**R**E**T**Q**Q**M**G**L**S**L**N**I**D**M**S**A**A**A**I**E**A**L**P**V**I**D**F**V**A**Q**L**-----**L**G**K**D**V** : 349  
CsAGO10c : **S**V**G**R**F**F**S**P**N**L**R**P**Q****F****I****N**G**L**Q**S**W**R**G**F**Y**Q**S**I**K**P**T**Q**M**G**L**S**L**N**I**D**M**S**A**A**A**I**E**A**L**P**V**I**D**F**V**A**Q**L**-----**L**G**K**D**V** : 301  
CsAGO1 : **F**V**G**R**S**F**S**P**D**I**R**K**P**Q**R****F**D**G**L**E**S**W**C**G**F**Y**Q**S**I**R**E**T**Q**Q**M**G**L**S**L**N**I**D**M**S**A**A**A**I**E**A**L**P**V**I**D**F**V**A**Q**L**-----**L**T**R**D**V** : 518  
CsAGO5c : **V**V**G**R**S**F**S**P**Q**L**G**D**T**H**G**D**G****I**E**Y**W**K**G**Y**O**S**L**R**E**T**Q**Q**M**G**L**S**L**N**I**D**I**S**A**R**A**F**Y**F**V**L**V**S**D**F**V**A**T**Y**-----**C**N**I**R**D** : 430  
CsAGO5a : **V**V**G**R**S**F**S**P**S**P**G**-**V**G**D****I**G**N**G**F**Q**Y**W**K**G**F**Y**Q**S**L**R**E**I**Q**M**G**L**S**L**N**I**D**M**S**A**R**A**F**Y**F**V**L**V**S**D**F**V**A**K**Y**-----**F**N**V**K**D** : 318  
CsAGO5b : **V**V**G**R**S**F**S**P**I**L**G**E**V**G**D****I**D**G**L**Q**Y**W**K**G**F**Y**Q**S**L**R**E**T**Q**Q**M**G**L**S**L**N**I**D**M**S**A**R**A**F**Y**F**V**L**V**S**D**F**V**A**K**Y**-----**F**N**V**R**D** : 335  
CsAGO2/3e : **F**V**G**R**S**F**Y**P**T**T**S**N**K**D**D****L**D**G**C**V**T**A**S**K**G**F**Q**H**S**L**K**P**T**S**Q**G**L**A**L**C**L**D**Y**S**V**L**A**H**K**R**K**L**P**V**I**D**F**L**KE**H**V**G**F**K**Q**V**N**D**M : 507

vgrsf5 6g G s t gl l D s a p6 d56

CsAGO2/3f : **R**R--**L**R**D**V**I**N-----**A**L**T**L**K**L**V**R**V**H**R**V**T**N**Q**Y**I**I**V**L**T**D**Q**N**T**R--**N**I**S**F**D**V**E**D**R**E**E**K**A**P**P**K**R****S**L**V**E**Y**R**G** : 497  
CsAGO2/3d : **T**R--**L**R**D**V**I**N-----**A**L**E**L**K**L**V**V**N**H**R**I**T**K**Q**Y**I**T**A**G**L**T**D**R**S**T--**D**L**S**F**D**V**N**D**E**P**E**G**A**P**P**R**R****S**L**V**E**Y**R**G** : 354  
CsAGO7 : **K**T**R**G**L**A**G**E**R**E**V**E**K**A**L**K**N**I**R**V**F**C**H**E**T**V**Q**R**Y**R**V**S**L**T**E**A**T**E--**N**L**W**F**D**H**S**G-----**R**T**L**R**V**N**Y**R**K**D : 459  
CsAGO10a : **I**S**R**T**S**D**S****D**R**V**K**I**K**A**L**R**G**V**K**V**E**V**T**H**R**G**H**V**R**R**K**Y**R**Q**L**T**S**Q**P-----**T**R**E**L**V**F**P**V**D**D**S**T**M**K**S**V**Y**E**Y**Q**E** : 425  
CsAGO2/3a : **R**T--**S**R**R**E**V**M**K**M**V**H**L**K**L**K**V**H**V**T**H**L**T**S**Q**Y**T**I**A**G**S**D**Q**N**T**R--**D**I**F**T**L**E**D**R**E**G**E**N**P**P**R**E**L****G**L**V**E**Y**R**G** : 495  
CsAGO2/3b : **R**T--**S**R**R**E**V**M**E**M**V**H**L**K**L**K**V**H**V**T**H**L**T**S**Q**Y**T**I**A**G**S**D**Q**N**T**R--**D**I**F**T**L**E**D**R**E**G**E**N**P**P**R**E**L****G**L**V**E**Y**R**G** : 513  
CsAGO6 : **P**F--**N**I**L**W**A**K**A**K**L**K**N**R**V**K**T**R**S**N**M**E**F****I**I**C**SE**K**P**C**Q**O**F**S**L**K**V**R**N**A**D**G**G**Y**G**A**E**L**I**D**V**I**D**V**Y**F**T**K** : 346  
CsAGO4c : **P**F--**S**I**D**W**A**K-----**Q**K**G**D**D**D**E**G**V**Q**T**L**V**D**V**I**D**V**Y**F**V**N : 315  
CsAGO4a : **P**F--**Q**V**D**W**A**K**A**K**L**K**N**L**R**I**K**V**I**P**S**N**M**E**Y**R**I**I**G**SE**S**P**C**K**E**Q**M**F**S**L**K**T**R**G**K**D--**E**N**E**S**V**D**V**I**D**V**Y**F**V**N : 348  
CsAGO4b : **P**F--**S**I**D**W**A**K**A**K**L**K**N**L**R**V**K**T**N**P**S**T**E**Y**K**I**T**GSE**K**P**C**K**E**Q**M**F**S**L**K**Q**K**G**D**D**D**E**G**V**Q**T**L**V**D**V**Y**F**V**N : 420  
CsAGO2/3c : **K**R--**S**R**R**D**V**M**R**-----**A**L**G**L**K**L**V**H**V**H**R**V**T**N**Q**Y**I**V**A**G**L**T**N**Q**A**R--**D**I**F**T**L**E**D**P**E**G**E**N**P**P**R**E**L****G**L**V**E**Y**R**G** : 427  
CsAGO10b : **I**S**R**T**S**D**S****D**R**V**K**I**K**A**L**R**G**V**K**V**E**V**T**H**R**G**N**M**R**R**K**Y**R**Q**L**T**S**Q**P-----**T**R**E**L**V**F**P**V**D**D**S**T**M**K**S**V**Y**E**Y**Q**E** : 415  
CsAGO10c : **Y**S**R**P**S**D**A****D**R**V**K**I**K**A**L**R**G**I**K**V**E**V**T**H**R**G**N**M**R**R**K**Y**R**Q**L**T**S**Q**P-----**T**R**E**L**I**F**P**V**D**E**E**K**N**M**K**S**V**Y**E**Y**Q**E : 367  
CsAGO1 : **S**S**R**P**S**D**A****D**R**V**K**I**K**A**L**R**G**V**K**V**E**V**T**H**R**G**N**M**R**R**K**Y**R**Q**L**T**S**Q**P-----**T**R**E**L**T**F**P**V**D**E**R**G**T**M**K**S**V**Y**E**Y**Q**E : 584  
CsAGO5c : **L**S**R**P**S**D**Q****D**R**V**K**I**K**A**L**R**M**V**K**V**L**H**S**E**D**V**K**R**--**K**I**S**G**V**S**V**R**P**-----**T**S**Q**L**T**F**P**D**S**G**D**T**Q**T**S**V**Y**E**Y**Q**E** : 494  
CsAGO5a : **L**T**R**P**S**D**Q****D**R**V**K**R**A**L**R**I**K**V**E**L**A**H**K**K**H**Q**C**R**-**R**I**S**G**L**S**V**R**P**-----**T**N**Q**L**T**F**P**L**D**T**G**E**K**M**S**V**Y**E**Y**Q**E** : 383  
CsAGO5b : **L**T**R**P**S**D**Q****D**R**I**K**V**R**A**L**R**I**R**V**E**L**H**R**E**D**G**K**R**Y**-**K**I**S**G**V**S**A**Q**P-----**T**S**Q**L**T**F**A**R**D**D**T**D**A**K**I**S**V**I**Q**Y**R**E : 400  
CsAGO2/3e : **R**R--**L**R**D**V**I**N-----**A**L**T**L**K**L**V**R**V**H**R**V**T**N**Q**Y**I**I**V**L**T**D**Q**N**T**R--**N**I**S**F**D**V**E**D**R**E**E**K**A**P**P**K**R****S**L**V**E**Y**R**G** : 571

1 h 6 YF

CsAGO2/3f : **K**N**K**E**K**H**-**K**D**I**E****C**L**D**L**G**K**N**N**R**I**N**V**M**P**E**F**C**I**L**V**E**G**Q**R**F**P**R**E**H**L**S**R**D**G**T**I**L**K**N**M**S**L**V**P**K**R**M**N**T**I**C**E**M**Q : 568  
CsAGO2/3d : **K**Y**G**K**E**L**M**-**K**D**I**E**S**L**D**L**G**K**N**R**I**N**V**M**P**E**F**C**I**L**V**E**G**Q**R**F**P**K**E**N**L**D**R**A**K**L**K**M**S**L**I**R**A**V**R**R**K**I**C**E**M**Q : 425  
CsAGO7 : **H**Y**N**D**Y**Q**F**-**R**N**L**E**F**L**O**I**S**--**S**P**C**H**L**P**E**M**E**L**C**M**I**C**E**Q**K**F**L**G**-**K**L**S**D**D**K**A**K**L**K**M**S**R**F**R**A**K**I**C**E**M**Q** : 528  
CsAGO10a : **M**G



```

CsAG02/3f : CCLFNHANNAN-DRYFANLAKLNKALKLGSNVEIEPILP----RFEFEGHVMFVGDVNHHPGARNSTCPSI : 808
CsAG02/3d : CCLSNHAYEAK-DOYLANLAKLNKALKLGSNVEINQRILP----RFDGEGHVMFVGDVNHHPAARNSTCPSM : 660
CsAG07 : CCLYPNLGLKLS-SQFLANLAKLNKALKLGSTVAIYNLSLPSQIFRLFQADDVFIIMGADVTHHPHLPDDFPSV : 770
CsAG010a : CCLTKHVFRIS-KOYLANVSLKINVRMGRNNTVLDALISCKTIF--LVSDIPTIIFGADVTHHPENEDSSPSI : 731
CsAG02/3a : CCLVGIANKGK-DQDLANLAKLNKALKLGSNVEINQPLP----GFEGDEHVMFVGDVNHHPKAFNASCPSI : 807
CsAG02/3b : CCLVGIANKGK-DQDLANLAKLNKALKLGSNVEINQMLP----GFEGDEHVMFVGDVNHHPKAFNASCPSI : 825
CsAG06 : CISP---TRIN-DOYLVNVLKLNKALKLGSTNSLAIIEHSAVIE--LTKDPTIILGMDVSHGSPQRSDIPSI : 643
CsAG04c : CIAP---TRVN-DOYLVNVLKLNKALKLGSLNSMLAVEHAPSIF--LVSKVPTIILGMDVSHGSPQOSDIPSI : 594
CsAG04a : CIAP---TRVN-DOYLVNVLKLNKALKLGSLNSMLSIEFARNIF--VVSNNPTIILGMDVSHGSPQHSVDPSI : 649
CsAG04b : CIAP---TRVN-DOYLVNVLKLNKALKLGSLNSMLSVEHSPSIF--LVSKVPTIILGMDVSHGSPQOSDIPSI : 681
CsAG02/3c : CCLVGNANKGN-DOYLANLAKLNKALKLGSLNSMLQSPF-----SVPS : 714
CsAG010b : CCLTKHVFRIT-KOYLANVSLKINVRMGRNNTVLDALISCKTIF--LVSDIPTIIFGADVTHHPENEDSSPSI : 721
CsAG010c : CCLTKHVLRIS-KOYLANVSLKINVRMGRNNTVLDALISCKTIF--LVSDIPTIIFGADVTHHPESGEDCPSI : 673
CsAG01 : CCLTKHVFRMS-KOYLANVSLKINVRMGRNNTVLDALISCKTIF--LVSDIPTIIFGADVTHHPESGEDCPSI : 892
CsAG05c : CCLTKHVFRMS-KOYLANVSLKINVRMGRNNTVLDALISCKTIF--LVSDIPTIIFGADVTHHPESGEDCPSI : 796
CsAG05a : CCLTKHVFRMS-KOYLANVSLKINVRMGRNNTVLDALISCKTIF--LVSDIPTIIFGADVTHHPESGEDCPSI : 876
CsAG05b : CCLTKHVFRMS-KOYLANVSLKINVRMGRNNTVLDALISCKTIF--LVSDIPTIIFGADVTHHPESGEDCPSI : 705
CsAG02/3e : CCLFNHANNAN-DRYFANLAKLNKALKLGSNVEIEPILP----RFEFEGHVMFVGDVNHHPGARNSTCPSI : 882
Cc q 1 N6 6K6N K Gg n L g dv h Ps

```

```

CsAG02/3f : AAVVATVNWPAANRYAARVCPQYHRSEKTLNFGTMCLELIQAYARIN----- : 855
CsAG02/3d : AAVVATLWPAANRYAARVCPQYHRKENTLNFGVMCELIIRIYAQIN----- : 707
CsAG07 : AAVVGSVNWPAANRYVSRMRSCTRHOETIEDLTAMVGEILDDFYEQE----- : 817
CsAG010a : AAVVASQDWPEVTKYAGLVCAEHRROELIQDLYKTWHDVVRGTFVSGG-----MIRDLVLRKATG----- : 792
CsAG02/3a : AAVVASVNWPAANRYVARICPEHRKEKIVNFGAICLDLVNTYAKLN----- : 854
CsAG02/3b : AAVVASVNWPAANRYVARICPEHRKEKIVNFGPMCLDLVNTYAKLN----- : 872
CsAG06 : AAVVGSRSWPLISRYRAAARTSSVHVESLFLKPLANGKDDGM-----RELLVDFEYQTS----- : 699
CsAG04c : AAVVSSRHWPILSRYRASVRTSPKVENIDSLYKRVSDTEDEGIFSKT---LSFNRELLLDLYVVS----- : 657
CsAG04a : AAVVSSRHWPILSRYRASVRTSPKVENIDSLYKRVSDTEDEGIFSKT---LSFNRELLLDLYVVS----- : 721
CsAG04b : AAVVSSRWQPLISRYRASVRTSPKVENIDSLYKRVSESEDEGIM-----RELLLEFYVT----- : 736
CsAG02/3c : SAITPAVSLNESYITCKESKCKDKAAIQ-----SDKTLK----- : 751
CsAG010b : AAVVASQDWPEVTKYAGLVCAEHRROELIQDLYKTWHDVVRGTFVSGG-----MIRDLVLRKATG----- : 782
CsAG010c : AAVVASQDWPEVTKYAGLVCAEHRROELIQDLYKTWHDVVRGTFVSGG-----MIRDLVLRKATG----- : 734
CsAG01 : AAVVASQDWPEVTKYAGLVCAEHRROELIQDLYKTWHDVVRGTFVSGG-----MIRDLVLRKATG----- : 953
CsAG05c : AAVVASMDWPEVTKYRGLVSAQPHREELINDLYKTIQDPQRTVHSG-----MIRRELLIAFRRTSTG----- : 857
CsAG05a : AAVVASMDWPEVTKYRGLVSAQPHREELINDLYKTIQDPQRTVHSG-----MIRRELLIAFRRTSTG----- : 937
CsAG05b : AAVVASMDWPEVTKYRGLVSAQPHREELINDLYKTIQDPQRTVHSG-----MIRRELLIAFRRTSTG----- : 766
CsAG02/3e : AAVVATVNWPAANRYAARVCPQYHRSEKTLNFGTMCLELIQAYARIN----- : 929
aA6v wp y Q e 6

```

```

CsAG02/3f : -----KVKPQRIVVF--RDGVSEGFQFQVLLYELDAIR : 886
CsAG02/3d : -----KVKPARIVVF--RDGVSEGFQFQVLLYELDLK : 738
CsAG07 : -----TKLPKRIIFV--RDGVSEGFQFQVLLYELDAIR : 848
CsAG010a : -----KVKPQRIVVF--RDGVSEGFQFQVLLYELDAIR : 822
CsAG02/3a : -----KVKPQRIVVF--RDGVSEGFQFQVLLYELDLK : 885
CsAG02/3b : -----KVKPQRIVVF--RDGVSEGFQFQVLLYELDLK : 903
CsAG06 : -----NG-----RKPQAIIILF--RDGVSEGFQFQVLLYELDAIR : 731
CsAG04c : -----SG-----KRPQAIIILF--RDGVSEGFQFQVLLYELDAIR : 690
CsAG04a : VVVRDGGFIMALHPCCGQAALACSHIERCCAIEPVFRILRIETNPKNLHYGMDGVSEGFQFQVLLYELDAIR : 793
CsAG04b : -----SG-----KRPQAIIILF--RDGVSEGFQFQVLLYELDAIR : 769
CsAG02/3c : -----KVP-----KVP----- : 754
CsAG010b : -----KQPRIIFV--RDGVSEGFQFQVLLYELDAIR : 812
CsAG010c : -----KQPRIIFV--RDGVSEGFQFQVLLYELDAIR : 764
CsAG01 : -----KQPRIIFV--RDGVSEGFQFQVLLYELDAIR : 983
CsAG05c : -----KQPRIIFV--RDGVSEGFQFQVLLYELDAIR : 887
CsAG05a : -----KQPRIIFV--RDGVSEGFQFQVLLYELDAIR : 967
CsAG05b : -----KQPRIIFV--RDGVSEGFQFQVLLYELDAIR : 796
CsAG02/3e : -----KVKPQRIVVF--RDGVSEGFQFQVLLYELDLK : 960
kp rdgvse qf vl e

```

```

CsAG02/3f : KAIYEE--HYRPTITLVAQKRHHQTRLEP-----EKMKDGGSTGNVPPGCTVVDKKTITHPFFDFDYLCSH : 948
CsAG02/3d : MAIYEE--HYRPTITLVAQKRHHQTRLEP-----ESMKDGGSPDNVPPGCTVVDKKTITHPFFDFDYLCSH : 800
CsAG07 : AACSRFP--SYKPPITFAVQKRHHQTRLEPNETQTHQSSSTRDQFLDENIPPGCTVVDKKTITHPFFDFDYLCSH : 919
CsAG010a : KACASLEPNYQFPVTFIVVQKRHHQTRLEFANN-----HRRSSTDKSGNIVPCTVVDKKTITHPFFDFDYLCSH : 889
CsAG02/3a : NAIYEG--NYRPTITLVAQKRHHQTRLEP-----ENERDGGASGNVPPGCTVVDKKTITHPFFDFDYLCSH : 947
CsAG02/3b : NAIYEG--NYRPTITLVAQKRHHQTRLEP-----ENERDGGASGNVPPGCTVVDKKTITHPFFDFDYLCSH : 965
CsAG06 : KAYQHIGEATIPKFTVIVAQKNHHTKFLPQSG----APENVPPGLFLCSI--CTVVDKRVVHPRNDFDFYMGCAQ : 797
CsAG04c : ESKFLDEKVSPEKFTVIVAQKNHHTKFLPQSG----SPNVNPP-----CTVIDNKVCHPNRDFDFYMGCAH : 749
CsAG04a : EACKFLDENWSPKFTVIVAQKNHHTKFLPQSG----SPNVNPP-----CTVIDNKVCHPNRDFDFYMGCAH : 852
CsAG04b : EACKFLDEKVSPEKFTVIVAQKNHHTKFLPQSG----SPNVNPP-----CTVIDNKVCHPNRDFDFYMGCAH : 828
CsAG02/3c : -----APKPSKPC-----AQNF----- : 766
CsAG010b : KACASLEPNYQFPVTFIVVQKRHHQTRLEFANN-----HRRSSTDKSGNIVPCTVVDKKTITHPFFDFDYLCSH : 879
CsAG010c : KACASLEPNYQFPVTFIVVQKRHHQTRLEFANN-----HNBKTSIDKSGNIVPCTVVDKKTITHPFFDFDYLCSH : 831
CsAG01 : KACASLEPNYQFPVTFIVVQKRHHQTRLEFANN-----HRBRNAVDRSGNIVPCTVVDKKTITHPFFDFDYLCSH : 1050
CsAG05c : KACVSLSENYLPPVTFVIVVQKRHHQTRLEFPAQ----HNBRSSTDRSGNIVPCTVVDKKTITHPFFDFDYLCSH : 954
CsAG05a : KACVSLSENYLPPVTFVIVVQKRHHQTRLEFPAQ----HSBRSSTDRSGNIVPCTVVDKKTITHPFFDFDYLCSH : 1034
CsAG05b : KACVSLSEADYLPVTFVIVVQKRHHQTRLEFPAE----HGBRSSTDRSGNIVPCTVVDKKTITHPFFDFDYLCSH : 863
CsAG02/3e : KAIYEE--HYRPTITLVAQKRHHQTRLEP-----EKMKDGGSTGNVPPGCTVVDKKTITHPFFDFDYLCSH : 1022
a p t qk h t lf pGt d hp dfy c h

```

```

CsAG02/3f : YGSLGTSRPHYHYVLDWDEHNFTSDQLQKLIYDLGFT-----FARCTKPVSLVPPVYAY : 1002
CsAG02/3d : YGSMGTSRPHYHYVLDWDEHNFTSDQLQKLIYDMCF-----FARCTKPVSLVPPVYAY : 854
CsAG07 : WGVKTSRPHYHYVLDWDEHNFTSDQLQKLIYVNCY-----FVRCTKPVSLVPPVYAY : 973
CsAG010a : AGIQTTSRPAHYHYVLDWDEHNFTADGIQSLTNNLCYT-----YARCTRSVSLVPPVYAY : 943
CsAG02/3a : YGNLGTSPKTHYVLDWDEHNFTSDQLQKLIYHLCYT-----FARCTKPVSLVPPVYAY : 1001
CsAG02/3b : YGNLGTSPKTHYVLDWDEHNFTSDQLQKLIYHLCYT-----FARCTKPVSLVPPVYAY : 1011
CsAG06 : AGMIGTSRPAHYHYVLDWDEHNFTSDQLQKLIYHLCYT-----YORSTTAISVAVPVCYAH : 851
CsAG04c : AGMIGTTRPHTHYVLDWDEHNFTSDQLQKLIYHLCYT-----YORSTTAISVAVPVCYAH : 803
CsAG04a : AGMIGTTRPHTHYVLDWDEHNFTSDQLQKLIYHLCYT-----YORSTTAISVAVPVCYAH : 906
CsAG04b : AGMIGTTRPHTHYVLDWDEHNFTSDQLQKLIYHLCYT-----YORSTTAISVAVPVCYAH : 882
CsAG02/3c : ----- : -
CsAG010b : AGIQTTSRPAHYHYVLDWDEHNFTADGIQSLTNNLCYT-----YARCTRSVSLVPPVYAY : 933
CsAG010c : AGIQTTSRPAHYHYVLDWDEHNFTADGIQSLTNNLCYT-----YARCTRSVSLVPPVYAY : 885
CsAG01 : AGIQTTSRPAHYHYVLDWDEHNFTADGIQSLTNNLCYTYVVSFNPSQLFLNHLQIYARCTRSVSLVPPVYAY : 1122
CsAG05c : AGIQ-----VNSVPPVYAY : 969
CsAG05a : AGIQTTSRPHYHYVLDWDEHNFTADALQIT-----LTNMPVYAY : 1073
CsAG05b : AGIQTTSRPHYHYVLDWDEHNFTADALQIT-----YARCTRSVSLVPPVYAY : 917
CsAG02/3e : YGSLGTSRPHYHYVLDWDEHNFTSDQLQKLIYDLGFT-----FARCTKPVSLVPPVYAY : 1076
g gt p hy l de f t d q l r t p ya

```

```

*          1460          *          1480          *          1500          *
CsAGO2/3f : LVA YRGRMPQEVVMEVSPVSVSSSSSS---ATSTSSLVSVS---SFDKDFYKLRHD----- : 1052
CsAGO2/3d : LVA YRGRMPQEVVVMKLPSPASSSSSSCS---SSSHAMVITQOSASFDEKFKLHP----- : 908
CsAGO7 : LAA YRGRGLYLERSDSSSISPFSSRNAAST---ISRAAF-----PKATPLPKLSEN----- : 1019
CsAGO10a : LAA FRARFYLEPDMQENGSSGGNA-----GKSTRANGESG---VRLPALKEN----- : 989
CsAGO2/3a : LVA YRGRQYQEVVMEFQPPPSVSSSSSS---SSSS-----AASLNERFYALHFD----- : 1047
CsAGO2/3b : LVA YRGRQYQEVVMEFQPPPSVSSSSSS---SSS-----AASLNERFYALHLD----- : 1064
CsAGO6 : LAAQQMGQFTIKFEEFSETSSGQK-----SLTSVGSAPVPELPLRLHDN----- : 893
CsAGO4c : LAA TQMGQFMKFEDMSETSSSHG-----GVT SAGAVPVQPLPLRLQENSCACSVYSHMASSFS : 860
CsAGO4a : LAA TQISLFMKFEDMSETSSSHG-----GLTSVGGPVPPELPLRLHSN----- : 948
CsAGO4b : LAA TQVQGFMKFEDQSETSSSHG-----GMTSAGARHVIDLARVTK----- : 923
CsAGO2/3c : ----- : -
CsAGO10b : LAA FRARFYMEPDMQENGSGGGQV-----GKSTRANGDTG---VRLPALKEN----- : 978
CsAGO10c : LAA FRARFYLEPHVHENAS-----MRA TRTVNGPC---IRLPLALKEK----- : 925
CsAGO1 : LAA FRARFYMEPETSDDSGSMSSAAVGRAGMMVPGARS TRVPGANAPVRLPALKDN----- : 1179
CsAGO5c : LAA FRARFYIEGETSESESTSGG-----RATRE---RNVEVRLPLLIKDN----- : 1011
CsAGO5a : LAA FRARFYIEGDTSENESTSGG-----RNTRE---RSIEVRLPLAIKAN----- : 1115
CsAGO5b : LAA FRARFYIEGETLEAGSSGGGRG-----AQAARE---RSLEVPQLPLIKDN----- : 964
CsAGO2/3e : LVA YRGRMPQEVVMEVSPVSVSSSSSS---ATSTSSLVSVS---SFDKDFYKLRHD----- : 1126
1 a

```

```

1520          *          1540          *          1560          *          1580
CsAGO2/3f : -----LENIIMFFV----- : 1060
CsAGO2/3d : -----LENIIMFFI----- : 916
CsAGO7 : -----VKKLMFYC----- : 1027
CsAGO10a : -----VKRVMEYC----- : 997
CsAGO2/3a : -----VKDTMEFI----- : 1055
CsAGO2/3b : -----LKDTMFFI----- : 1072
CsAGO6 : -----VAGSMFYC----- : 901
CsAGO4c : IAMSTWPQRMCSGCGYGHCLVKVRSRSHKNPGRAYYVCPPAHGTRILLDHDSGSTDVMQAEAVEDGGNGDSSGGD : 932
CsAGO4a : -----VCSSMFFC----- : 956
CsAGO4b : -----VVQLAFCVLFVLVPSDAYPLLE----- : 945
CsAGO2/3c : ----- : -
CsAGO10b : -----VKRLQOGLQFRSMI IKEQE----- : 998
CsAGO10c : -----VKNVMFYC----- : 933
CsAGO1 : -----VKRCYLAAVAFWPVAVGSPLES----- : 1200
CsAGO5c : -----VKDVMFYC----- : 1019
CsAGO5a : -----VKDVMFYC----- : 1123
CsAGO5b : -----VKAVMFYC----- : 972
CsAGO2/3e : -----LENIIMFFV----- : 1134
f

```

```

*          1600          *          1620          *          1640          *
CsAGO2/3f : ----- : -
CsAGO2/3d : ----- : -
CsAGO7 : ----- : -
CsAGO10a : ----- : -
CsAGO2/3a : ----- : -
CsAGO2/3b : ----- : -
CsAGO6 : ----- : -
CsAGO4c : IGDSEAGGDVVEGGEDESSEVVDRAPEFRPDLGFEAIEVGGAWESGEAVAPPWPKPRRGVWVDDYPSLLLPAL : 1004
CsAGO4a : ----- : -
CsAGO4b : ----- : -
CsAGO2/3c : ----- : -
CsAGO10b : ----- : -
CsAGO10c : ----- : -
CsAGO1 : ----- : -
CsAGO5c : ----- : -
CsAGO5a : ----- : -
CsAGO5b : ----- : -
CsAGO2/3e : ----- : -

```

```

1660          *          1680          *          1700          *          1720
CsAGO2/3f : ----- : -
CsAGO2/3d : ----- : -
CsAGO7 : ----- : -
CsAGO10a : ----- : -
CsAGO2/3a : ----- : -
CsAGO2/3b : ----- : -
CsAGO6 : ----- : -
CsAGO4c : VRLVCSSEDEVHSSASNTFNPDLQPALGDRGKESKLDADRVLKLIPQWSESVEDWNSLIEPLIDKMFAPES : 1076
CsAGO4a : ----- : -
CsAGO4b : ----- : -
CsAGO2/3c : ----- : -
CsAGO10b : ----- : -
CsAGO10c : ----- : -
CsAGO1 : ----- : -
CsAGO5c : ----- : -
CsAGO5a : ----- : -
CsAGO5b : ----- : -
CsAGO2/3e : ----- : -

```

```

*          1740          *          1760          *          1780          *          1800
CsAGO2/3f : ----- : -
CsAGO2/3d : ----- : -
CsAGO7 : ----- : -
CsAGO10a : ----- : -
CsAGO2/3a : ----- : -
CsAGO2/3b : ----- : -
CsAGO6 : ----- : -
CsAGO4c : NAIIVRWENQNYEVDNPLKLEHSLFDRLCPLLIIRLLPLRVFNLDNSSLTYGELCKQDTGYFDIHDAESVAG : 1148
CsAGO4a : ----- : -
CsAGO4b : ----- : -
CsAGO2/3c : ----- : -
CsAGO10b : ----- : -
CsAGO10c : ----- : -
CsAGO1 : ----- : -
CsAGO5c : ----- : -
CsAGO5a : ----- : -
CsAGO5b : ----- : -
CsAGO2/3e : ----- : -

```

```

*      1820      *      1840      *      1860      *
CsAG02/3f : ----- : -
CsAG02/3d : ----- : -
CsAG07 : ----- : -
CsAG010a : ----- : -
CsAG02/3a : ----- : -
CsAG02/3b : ----- : -
CsAG06 : ----- : -
CsAG04c : ILLNRAFNFKFEFEDVRKLSAELCGRIHPQVLFPLIASQLEHAVDARDALKIKACLFSICTSLVARGRDSLLH : 1220
CsAG04a : ----- : -
CsAG04b : ----- : -
CsAG02/3c : ----- : -
CsAG010b : ----- : -
CsAG010c : ----- : -
CsAG01 : ----- : -
CsAG05c : ----- : -
CsAG05a : ----- : -
CsAG05b : ----- : -
CsAG02/3e : ----- : -

```

```

      1880      *      1900      *      1920      *      1940
CsAG02/3f : ----- : -
CsAG02/3d : ----- : -
CsAG07 : ----- : -
CsAG010a : ----- : -
CsAG02/3a : ----- : -
CsAG02/3b : ----- : -
CsAG06 : ----- : -
CsAG04c : PIVLKIRNTIETILLWPSSNGDEVSKAQHGICDCLALMICTELQALESFRDLTSKNTSLVRMDSRDAAMRD : 1292
CsAG04a : ----- : -
CsAG04b : ----- : -
CsAG02/3c : ----- : -
CsAG010b : ----- : -
CsAG010c : ----- : -
CsAG01 : ----- : -
CsAG05c : ----- : -
CsAG05a : ----- : -
CsAG05b : ----- : -
CsAG02/3e : ----- : -

```

```

*      1960      *      1980      *      2000      *
CsAG02/3f : ----- : -
CsAG02/3d : ----- : -
CsAG07 : ----- : -
CsAG010a : ----- : -
CsAG02/3a : ----- : -
CsAG02/3b : ----- : -
CsAG06 : ----- : -
CsAG04c : SVRSYVIHQLTRDKDCTYEASISMSFVLCMANVLI SACQKIPDSCCKRPFAREILPRLIQSVEVMMESEYRAA : 1364
CsAG04a : ----- : -
CsAG04b : ----- : -
CsAG02/3c : ----- : -
CsAG010b : ----- : -
CsAG010c : ----- : -
CsAG01 : ----- : -
CsAG05c : ----- : -
CsAG05a : ----- : -
CsAG05b : ----- : -
CsAG02/3e : ----- : -

```

```

      2020      *      2040      *      2060      *      2080
CsAG02/3f : ----- : -
CsAG02/3d : ----- : -
CsAG07 : ----- : -
CsAG010a : ----- : -
CsAG02/3a : ----- : -
CsAG02/3b : ----- : -
CsAG06 : ----- : -
CsAG04c : CLQVFFSAVYHLKSTILPYTSDLLRVSLKSLREGSEKEKMAGAKLMSLMASEEAIVNSIAGGLEAITVLS : 1436
CsAG04a : ----- : -
CsAG04b : ----- : -
CsAG02/3c : ----- : -
CsAG010b : ----- : -
CsAG010c : ----- : -
CsAG01 : ----- : -
CsAG05c : ----- : -
CsAG05a : ----- : -
CsAG05b : ----- : -
CsAG02/3e : ----- : -

```

```

*      2100      *
CsAG02/3f : ----- : -
CsAG02/3d : ----- : -
CsAG07 : ----- : -
CsAG010a : ----- : -
CsAG02/3a : ----- : -
CsAG02/3b : ----- : -
CsAG06 : ----- : -
CsAG04c : SLSSSDPSPDVRQVSEKLLACLTSL : 1461
CsAG04a : ----- : -
CsAG04b : ----- : -
CsAG02/3c : ----- : -
CsAG010b : ----- : -
CsAG010c : ----- : -
CsAG01 : ----- : -
CsAG05c : ----- : -
CsAG05a : ----- : -
CsAG05b : ----- : -
CsAG02/3e : ----- : -

```





```

*          900          *          920          *          940          *          960
CsDCL1a : TDVNNPFLQARRDVYLGNEETLGGRRREYGFGLRHGVAFCGKSHPTFYCIRGAQAFDVIASGLVFNNAF : 827
CsDCL1b : TDANNPFLQARRDVYLGNEETLGGRRREYGFGLRHGVAFCGKSHPTFYCIRGAQAFDVIASGLVFNNAI : 222
CsDCL2 : ITVFRVLLDHNHLKLIK-----ELLAFHNSNDLAVLDYVLFPCSSNQPS----LINDGSSVFPFKILGHN : 842
CsDCL3 : EFFFGLGFCGLFVRLKSSRGGKFLFQGGSLWEPSSNYMLLPLISSLNVSDPEWRNMGNSCIVSVEFLKEN : 868
CsDCL4 : EMLYLVLDLDRSEFIFSEFV-----LGGKMGFGSGSPTFVLLPVLVLCYSKSTT-----DMLKLRCLSSPFIASRQ : 735
          1          1          6          6          6          6
          *          980          *          1000          *          1020
CsDCL1a : EICGNHLDLT-----KGRUMMADSFIVGVEDVGRVITAAHSGKRFVDSVRYDMIAENSF : 881
CsDCL1b : EICGNHLDLT-----KRRUMMADSFIVGVEDVGRVITAAHSGKRFVDSVRYDMIAENSF : 276
CsDCL2 : HMTNTPNSS-----CRQRTKNGLVCSMCENSDVYVTPHND-XVIVSIAGTLD----- : 888
CsDCL3 : AWLSAEQSSGDRGNSSVHGNTSIESECKATNVHLANKSITTKNREMVVLAITHG-RIVSVLRAVDNIGAES : 941
CsDCL4 : DARDSVIPHLN-----NHFLANLGHITINVDVYVYVAPCKDTEFTISDVVPE----- : 783
          6 a1          6          6V a h          5          d

          1040          *          1060          *          1080          *          1100
CsDCL1a : PRREGYLCELEYSYADYVQRKGVGLIYKQQLIRGRVSYCKNLLSPRFHSEAHGDE-----SEALDITY : 950
CsDCL1b : PRREGYLCELEYSYADYVQRKGVGLIYKQQLIRGRVSYCKNLLSPRFHSEAHGDE-----SEALDITY : 345
CsDCL2 : LHGNS-LLEKGCITVYKIVMSKIGIDLHGRSELNLRHIFTVCNLYHRCC-----KKRESRNA : 948
CsDCL3 : FDCNSDAIYSSYSSAFYSKKGIGITLHPGQFLLLKQSHNAHLVDFRNEGASFGKLEAVINKMAVEKPRN : 1015
CsDCL4 : --KNGYSFPNDSNIHIEHTITLNDGSGSRCHRHWYETSMAVMDVYHKEWLSG----- : 834
          y5 k5g l          1          1 l

          1120          *          1140          *          1160          *          1180
CsDCL1a : YVFLPPELCEVHFPLPASFVGAQR-----LPSTMRVRESMLLAQLKDLINYPVFA-SHLEAATAAS--CQEP : 1016
CsDCL1b : YVFLPPELCEVHFPLPASFVGAQR-----LPSTMRVRESMLLAQLKDLINYPVFA-SHLEAATAAS--CQET : 411
CsDCL2 : YVFLPPELCEVFMSPRIATVYSVSPVSTMRVRESMLLAQLKDLINYPVFA-SHLEAATAAS--CQET : 1006
CsDCL3 : HVHMPPELLVSDIVPINALSPYL-----LPSLMVRESMLLAQLKDLINYPVFA-SHLEAATAAS--CQET : 1086
CsDCL4 : -----NGPNSLPSLMVRESMLLAQLKDLINYPVFA-SHLEAATAAS--CQET : 890
          v ppe1          p          6PS6M R6Es 66A L4          6          6          c e

          *          1200          *          1220          *          1240          *          12
CsDCL1a : FCYERAEELGDAYLKVVSRRFLFLKYPKHEGQLTRLQQMVSNMVLYQVYLNGLQSYIQADRFAESMAAP : 1090
CsDCL1b : FCYERAEELGDAYLKVVSRRFLFLKYPKHEGQLTRMQQMVSNMVLYQVYLNGLQSYIQADRFAESMAAP : 485
CsDCL2 : -----TSKGFIRNPEPDEKMTIVP : 1026
CsDCL3 : FSMERLEELGDSVLKYSVCHLFLKYPKHEGQLSARRSWAVCNSTLHKLGTDNLQPIRDFGABERWIA : 1160
CsDCL4 : FSLERLEVLGDALFAVCRHFLFLDHTLDEGLTRKRSNIVNNSLKLATMSKLEQPIRDFGABERWIA : 964
          f er e lgd lk v lfl          eg l r v n l          lq 5I          F P 5 pG

          60          *          1280          *          1300          *          1320
CsDCL1a : VLPFDEDIETGSSFLDDEETALGVTPGEAQDAGYEDDEMEDGELESYSSYVIVSSKTLAVVVEALIGIY : 1164
CsDCL1b : VLPFDEDIETGSSFLDNERALGVTPGEAQDAGYEDDEMEDGELESYSSYVIVSSKTLAVVVEALIGIY : 559
CsDCL2 : DQ-----SGDYALDEESLSTRKVIYGRKRKSTVAVVVEALIGIY : 1070
CsDCL3 : QRSHPGPCSCG-----DTEVPLVLIKFTEDAKVYKCCDRHMMGSKTISVVEALIGIY : 1220
CsDCL4 : RPCPVICSYT-----EAIHSPQENSLTNDANVEVRCRGRHMMHKKTISVVEALIGIY : 1021
          d          e          r 6 sKt6 DVvEALIG 5

          1340          *          1360          *          1380          *          1400
CsDCL1a : VEGEKNAANHLKWKIGIDDFDEKLELCTTPNVPESITLRSINFDALGAININIKRGSVVEALITHSRPSS : 1238
CsDCL1b : VEGEKKAANNLKWIGIDDFDEKLELCTTPNVPESITLRSINFDALGAININIKRGSVVEALITHSRPSS : 633
CsDCL2 : STGEEASLSFMDLGHVWDEVNIPYRHFVQAER-----LVNKKYFSLRVAEALVVEALIGIY : 1139
CsDCL3 : VGGELTAAQLKRWLGVDALELSVDEAIVASVASTPAAKEETLRSKGLRGLLEALVVEALIGIY : 1294
CsDCL4 : VDSFKAAAFKRWLGVDALELSVDEAIVASVASTPAAKEETLRSKGLRGLLEALVVEALIGIY : 1095
          v gG aA          6kW6G6          df          1E L          F          gIlL62A tH S

          *          1420          *          1440          *          1460          *          1480
CsDCL1a : GVS-CYQRLEVFGDVAIDLITLKHLEFITYSLDPGRLLDRAAANNENFARVAVKHKLHMLDRHSGSALEKO : 1311
CsDCL1b : GVS-CYQRLEVFGDVAIDLITLKHLEFITYSLDPGRLLDRAAANNENFARVAVKHKLHMLDRHSGSALEKO : 706
CsDCL2 : ETPCYQRLEVLGDSVLDLITLKHLEFITYSLDPGRLLDRAAANNENFARVAVKHKLHMLDRHSGSALEKO : 1213
CsDCL3 : GVCYQRLEVFLGDSVLDLITLKHLEFITYSLDPGRLLDRAAANNENFARVAVKHKLHMLDRHSGSALEKO : 1368
CsDCL4 : WGG-CYQRLEVFLGDSVLDLITLKHLEFITYSLDPGRLLDRAAANNENFARVAVKHKLHMLDRHSGSALEKO : 1168
          CYQRLE56GD VLD LIT hL5          y 6 PG LdLR a VnN          5A          Avk          lh h6 h S          L          6

          *          1500          *          1520          *          1540          *
CsDCL1a : RDFVYRQDELKSKFGFNS-----FGLGDCAPKVLGDIIVSIIAGAILDSSGR- : 1358
CsDCL1b : RDFVYRQDELKSKFGFNS-----FGLGDCAPKVLGDIIVSIIAGAILDSSGR- : 753
CsDCL2 : VATIQNFQELQSDVTTG-----WESETTFKVLGDIIVSIIAGAILDSSGR- : 1259
CsDCL3 : TEYKFTISGSQRTQP-----LQGGGLTFLGDIIVSIIAGAILDSSGR- : 1412
CsDCL4 : NKYVNFIRTTALEKGVVEGSPCKPYGYGYLNGCTCTGYAKYVCEILGNDMGTFVGDIVSIIAGAILDSSGR : 1242
          V          f          k          6GD66ES aGAI          6D3g

          1560          *          1580          *          1600          *          1620
CsDCL1a : ---DTAVFQPLHPMVTPELTPHVEVRELQERQQQAEGLEYKARRNENAVTEVEFDG---VQVGIKQPQRK : 1426
CsDCL1b : ---DTAVFQPLHPMVTPELTPHVEVRELQERQQQAEGLEYKARRNENAVTEVEFDG---VQVGIKQPQRK : 821
CsDCL2 : KEVWLSIRPLHPMVTPELTPHVEVRELQERQQQAEGLEYKARRNENAVTEVEFDG---VQVGIKQPQRK : 1333
CsDCL3 : LDEWRIEPLHPMVTPELTPHVEVRELQERQQQAEGLEYKARRNENAVTEVEFDG---VQVGIKQPQRK : 1486
CsDCL4 : LNRNWKIVLSPVDFVMSFSKFLNPKQELKLDLDFHSSKPEFPIYKKNVFFVVEAKKAKNNWITACNTINK : 1316
          p16 P663p          6 P rEL e C          e          4          6          e          6          4k

          *          1640          *          1660          *          1680          *          1700
CsDCL1a : MAQKLAARCMPLCSEGGPAHAKR-----FTFAVRVNTTDELTEECIGEPMSVYKAKSAVLLLELLNK : 1493
CsDCL1b : MAQKLAARCMPLCSEGGPAHAKR-----FTFAVRVNTTDELTEECIGEPMSVYKAKSAVLLLELLNK : 880
CsDCL2 : TKKLAARCAVLSKSEGG-----MTGACEQQNACSSNFR----- : 1367
CsDCL3 : MAQKLAARCMPLCSEGGPAHAKR-----FTFAVRVNTTDELTEECIGEPMSVYKAKSAVLLLELLNK : 1560
CsDCL4 : AQRILAAQKLYGNISMAESSEQDLDSNFAGLRSSHNVDFQRQLRVFPNSRNFAGYLLSKSLEEVKSSLK : 1390
          A          aa          6          1          k          k          k

          *          1720          *          1740          *          1760
CsDCL1a : LYP----- : 1496
CsDCL1b : LYP----- : 883
CsDCL2 : ----- : -
CsDCL3 : NPYHSDDCSSKSCDIPGAFKRRNSLGNLVVSLLEEINYLKLDGNYSLICIGMPSAKSARLRRRILFLGDRSYEFE : 1634
CsDCL4 : NEARKLIGHDEASIDVTAPDAIPLDN-----LKLQESSRQCQLKVPVHSPQEPKTFPHRIRSIETEPQPSLEAQ : 1458

          1780          *          1800          *          1820          *          1840
CsDCL1a : ----- : -
CsDCL1b : ----- : -
CsDCL2 : ----- : -
CsDCL3 : KGLADATIGRRHVVDIVERGGQVRQAIELFGA-EIKWVADQMRKASKMNTVGVFLGRVSRGQSRVKRDGRALVME : 1707
CsDCL4 : GPQSTAGGDHNLVGGSCCKSAKSRHLHECAANCKWPPSFKCKEIGPSHLKBEFIFKVSVDIEEASDVIAAGPAP : 1532

          1860
CsDCL1a : ----- : -
CsDCL1b : ----- : -
CsDCL2 : ----- : -
CsDCL3 : HRDLVRSAAHDGYRDLGKMKTSQIS- : 1733
CsDCL4 : HSRKKDAABHAAGAELWLYKKNAGYLHD : 1559

```



```

*           680           *           700           *           720           *           740
CsRDR1c : AAADIRKMGDFPHRIRNVAKYAARLGCSFSSRRELSVGRDEFEIIPDVEVVRGGIEYVFSDCGKISADFAAR : 587
CsRDR1a : AAADIRKMGDFPHRIRNVAKYAARLGCSFSSRRELSVSRHEIEIPDVEVVTGGNKYVFSDCGKISADFAAR : 543
CsRDR1b : AAADIRNMGDFRQIRRNAKYAARLGCSFSSTRELSVSRHEIEIPDVEVVTGRGKYVFSDCGKISSDFAAR : 541
CsRDR2 : KTEIDIRDMGCFNKRISYKGAARMGOLFSSTQCLEISAQEVETIPDVEITSDGVCYCFSDCGKISSNFAAR : 590
CsRDR5a : ANFVGEYIWTLERFLNHANGEKSLLRGSEAHRREFT-----IMQRLFYNG : 269
CsRDR5b : EVNEFASLLSILEVFLDHANGEKSLLRGSEAHRREFT-----IMQRLFYNG : 197
CsRDR6a : -----VGRFK-NRNIAKCAARMGCSFSSTVAVEVVEPNEVNAELLDIKRN---NVYVSDGKISADFAAR : 61
CsRDR6b : SVLNIKDMQKFT-DYNVAKCAARMGCSFSSTVAVEVPHKVEVNFKLDEDVRNR-----GVYVSDGKISADFAAR : 704
CsRDR6c : SVLNIKGMQKFT-DNRVAKCAARMGCSFSSTVAVEVPHKVEVNFKLDEDVRNR-----GVYVSDGKISADFAAR : 611
          g g f          a          aa4 g2 f S T e d          y fsdg6g 6

*           760           *           780           *           800
CsRDR1c : RVAVKCCKSSTPSAFCRYGGYKGVVID---TSIRKSLRRSFKYESENTKLDLAWSKYQPCFLNROLIS : 659
CsRDR1a : SVAKKCCELTSAPFCRYGGYKGVVAVD---SRSMKSLRMSSKYESDHKLDLRWCSMPSELNROFIT : 614
CsRDR1b : RVAKKCCKSSTPSAFCRYGGYKGVVAVD---NRSMKSLRMSSKYESDHKLDLAWSKYQPCFLNROLIT : 613
CsRDR2 : QVAKCCNHTSAPFCRYGGYKGVITVDR---NRFRMLGLSSLNFKESDKRMLNTSWSESMPCYLNRRAFR : 661
CsRDR5a : RAVKGTLVNRKPEKTQVR---SMIRVETDRSRVQFNSLETIGSNPKKNYLSRLIA : 331
CsRDR5b : RAVKGTLVNRKPEKTQVM---SMIRVEADSRSVQFNSLETIGSNPKKNYLSRLIA : 245
CsRDR6a : EVAEKLQTVNPCYQRYAGCKGVIACWPKNEKIRLSLRSKNFKESKHALLECSWTRFPQFPFLNROITIT : 135
CsRDR6b : EVAERLQCVNPCYQRYAGCKGVIACWPKNEKIRLSLRSKNFKESKHALLECSWTRFPQFPFLNROITIT : 778
CsRDR6c : EVAERLQCVNPCYQRYAGCKGVIACWPKNEKIRLSLRSKNFKESKHALLECSWTRFPQFPFLNROITIT : 685
          va r L          a q1ry g kvv          46slr s6 k 23          1 6 w          p lnr

*           820           *           840           *           860           *           880
CsRDR1c : LLSILGVDRIFFEKQKEVDQLDTLLDPLRAQEAELELMAPGENTNIKEMLCGYCPDAEPFLSMMLQTFRS : 733
CsRDR1a : LLSILGVEDDHFERQSEVEEELDNMLDSLRAWEAELELMCTGENTNIKEMLCGYCPDAEPFLSMMLQTFRA : 688
CsRDR1b : LLSILGVDRDHFERQSEVEEELNTLDPLMAQEAELELMSPGENTNIKEMLCGYCPDAEPFLSMMLRAFR : 687
CsRDR2 : LLSILGVEDDTFAEMQDLCLGKMLSKEAALDLVESMGRDAKGIVKMLQGEVENPMEYLSMLIRAHDD : 735
CsRDR5a : LLSYGVPKYFLDLTNALEDQACVSNKRTALKVAINHGEMDDNTTAQMLISGT-PLEPYIQYRILSVLAK : 404
CsRDR5b : ----- : -
CsRDR6a : LLSILKVADETFWKQSMIKCKLNMTVNTEVAFDVLTASCAEC-GNTAAIMLSAGEKQTELHIRGMITCIRA : 208
CsRDR6b : LLSALNVPDEFWQSMIKCKLNDADVAFDVLTASCAEC-GNVGAMLSAGENQEPHIRGMITCIRA : 851
CsRDR6c : LLSALNVPDEFWQSMIKCKLNDADVAFDVLTASCAEC-GNVGAMLSAGENQEPHIRGMITCIRA : 758
          lls l v d f          q          1          a          1          m          g          p          ep          1

*           900           *           920           *           940           *           960
CsRDR1c : AKLLELRTTRIFVPKGRSMMGCLDERTLEYGVFVQISGAGDR---MHGSSSSQRKFIVEBKVVVA : 799
CsRDR1a : AKLLELRTKARIFVPKGREMLGCLDERTLEYGVFVQISGVGHRAFYDDLMLMPSDSDSDQPNFIVQKVVVA : 762
CsRDR1b : AKLLELRTTRIFVPKGRSMMGCLDERTLEYGVFVQISGVGHRPFYDDLMLLGGSSDSDQHNRVEGKVVVA : 761
CsRDR2 : NQLSDLRTRCIFVPQGRILIGCLDEDTILNYGVYVIRMTKAELQAGE---QSSFQRIDTSVLIGKVVVT : 806
CsRDR5a : EVRKLGK-GKLPESFYLMGTADPEESNSDEWCVIL-----DNGSISQVLVI : 454
CsRDR5b : ----- : -
CsRDR6a : QLWGLREKARIFSSGRWLMGCLDELVLEQGCFVQVSSPTLENCFAN---HGSRFSGTKNLLVIKEFVVIT : 280
CsRDR6b : QLWGLREKSRIFVSGRWLMGCLDELAVLEQGCFIQVSTPLENCFAN---HGSRFSKPKKNVQVIKEFVVIT : 923
CsRDR6c : QLWGLREKSRIFVSGRWLMGCLDELAVLEQGCFIQVSNPLENCFAN---HGSRFSKPKKNVQVIKEFVVIT : 830
          1          f          gr          gldel          1          g          C          I          Q          V          N          P          L          E          N          C          F          A          N          g          v

*           980           *           1000           *           1020           *
CsRDR1c : KNPCLHFGDIRVLVAVVAPALH---MVDCVVPQKGLR----- : 835
CsRDR1a : KNPCLHFGDOVRLVAVVAPALH---MVDCVVPQKGLR----- : 798
CsRDR1b : KNPCLHFGDOVRLVAVVAPALH---MVDCVVPQKGLRLVDADKHMSFVSINLLMRLPVDKHRFGLKAT : 831
CsRDR2 : KNPCLHFGDIRVLVAVVAPALH---GWNCVFVPQKGLR----- : 844
CsRDR5a : RNECLHFGDIHVLKAVYYGLEDFVGNAKYALFESTKGRR----- : 494
CsRDR5b : ----- : -
CsRDR6a : KNPCLHFGDIRVLVAVVAPALH---SDCLVFPQKGLR----- : 316
CsRDR6b : KNPCLHFGDIRLLVAVVAPALH---LVDCVVPQKGLR----- : 959
CsRDR6c : KNPCLHFGDIRLLVAVVAPALH---LVDCVVPQKGLR----- : 866
          npclhpgd r l av          1          c          fpqkg r

1040           *           1060           *           1080           *           1100
CsRDR1c : -----PHNECSGSDLDGDLYFWSDSLIPE--RQIKPMDYTAQSMLDHDVIE----- : 885
CsRDR1a : -----PHNECSGSDLDGDLYFWCWDPDLIPE--QVKPMDYTAQSMLDHDVIESYALFLLLF : 857
CsRDR1b : AASCGTASTYIILPHNECSGSDLDGDLYFWCWDPDLIPE--QVKPMDYTAQSMLDHDVIESESKEWRSIQ : 903
CsRDR2 : -----PHNECSGSDLDGDLYFWNENLIPE--QVTPMDYTGRPRSDHDVLE----- : 894
CsRDR5a : -----SVGSELANGFDGDMYWSRNPELLRHFKPSYPMSRIYSTPNACNTKKSELSAELEHEL : 555
CsRDR5b : ----- : -
CsRDR6a : -----PHTNEASGSDLDGDLYFWTDNENLIPPKRSWVPMDYTAEVKSPRTVTOR----- : 368
CsRDR6b : -----PHTNEASGSDLDGDLYFWTDNENLIPPKRSYPMDYEVPKLPRVNQK----- : 1011
CsRDR6c : -----PHTNEASGSDLDGDLYFWTDNENLIPPKRSYPMDYEVPKLPRVNQK----- : 918
          ph ne sg dldg y w l pp          pmdy          v

1120           *           1140           *           1160           *           1180
CsRDR1c : -----EVEEYFNYLNDSLGIIANAHTWFADR---EPNKMSDFCIAELFSIAV : 934
CsRDR1a : VISCSS-----TFFLLVLRLIEEQEPANYVNNSLGIIANAHTWFADR---EPSKMSDFCIAELFSIAV : 925
CsRDR1b : SMPQHSLGWDPMSNRDLNDHREVEYFNYVNSLGIIANAHTWFADR---EPLKMSDFCIAELFSIAV : 975
CsRDR2 : -----EHKEFVDYINDTLGTISTAHLHADDR---EPSLKSSCKLADLHSMA : 943
CsRDR5a : FQLFKR-----TRFQQSYNMSVADSWLAFMDRLLLGLCSCSEKDSMKETTMHHIDIYCEAL : 613
CsRDR5b : -----NMSVADSWLAFMDRLLLGLCSSSVEKDRMKETTMHHIDIYCEAL : 291
CsRDR6a : -----DIDEFSKNVENLGAICNAHWHAAL---SEYGALDEKCITAEKAATAV : 417
CsRDR6b : -----DIDEFSRNVENLGAICNAHWHAAL---SEDGAQDEKCITAEKAATAV : 1060
CsRDR6c : -----DIDEFSRNVENLGAICNAHWHAAL---SEYGALDEKCITAEKAATAV : 967
          5          6          n          lg          i          ah          6          ad          a          c          la          A6

*           1200           *           1220           *           1240           *           12
CsRDR1c : DFPKTVPAEIPSDLRVKEYPDFMEPKDRTYESEVIGVLGFRAWKDIAPHNSIESFTREVARKS-YDPMEV : 1007
CsRDR1a : DFPKTVPAEIPDLRVVKEYPDFMEKSDKSTYESKRVLGKLFRAWKDISPQSSIKSFTKEAVANS-YDPMEV : 998
CsRDR1b : DFPKTVPAEIPTLRVVKEYPDFMEPKDRTYESEVIGKLFRAWKDISPQSSIKSFTKEAVANS-YDPMEV : 1048
CsRDR2 : DFPKTVCAPEMRFLKEYPDFMEQWKTPNYSKVLGLKLYRATVNSPHESAVLSWSEKIAQDA-YDPMEV : 1016
CsRDR5a : DFPKTVCKKKCDTDLLLPLTGILDPLDEVVPIQKAEFPHYPKPNKYHSTSVLGLIYEMVESFQSDLA : 687
CsRDR5b : DFPKTVCKKK-----THFNALP-----FWLSC : 311
CsRDR6a : DFPKTVQLVTMPSQLFKYYPDFMGEPFQSYSKKILGRLYRQELDAYDNVEAPSELTFPGDIPYDTLEY : 491
CsRDR6b : DFPKTVKIVTMPSQLFKYYPDFMGEAYRSYSKKILGRLYRQELDAYDNVEAYPEQTFPESIPYDGDLLEY : 1134
CsRDR6c : DFPKTVKIVTMPPPKLFKYYPDFMGEAFRSYSKKILGRLYRQELDAYDNVEAYPEQTFPESIPYDGDLLEY : 1041
          Dfpk3g          p          l          k          pdfm          y          s          g          l          r          y          p          d          yd          46

*           60           *           1280           *           1300           *           1320           *
CsRDR1c : DGFEDYDDDAYDKNEYDFKGNLDYGIKTEAEILGSIMKSTFDKRRD---SEAVGLAVRSLRKEAR : 1076
CsRDR1a : DGFEDYDDDAYDCNYDDKGNLDYGIKTEAEILGSIMKSTFDKRA---EKDVGLAVRSLRKEAR : 1067
CsRDR1b : DGFEDYDDDAYDKNEYDFKGNLDYGIKTEAEILGSIMKSTFDKRRD---SEAVGLAVRSLRKEAR : 1117
CsRDR2 : NGFEDYDEVAQSHKEMYLDKMSTLNFYEAESDEILGNLRTKSAMLLDNRYGMEMKDRLVKSYLKEAR : 1090
CsRDR5a : KDVEMKLPCDDVEIPTSCMK-----LWGERYSQRCEMTEAMLLDDESK-----NDAANVTRKYQL : 746
CsRDR5b : MWISTRKAFA-----MVPRNLYGPD-----NTSAALKS----- : 342
CsRDR6a : PGSMDFADAWEHKSYDQLNGLLGQYKVREEEIVTGHIWSPKNSRQRG-----ELOEKLKHAYSLRKEFP : 562
CsRDR6b : PGSMDFADAWEHKSYDQLNGLLGQYKVREEEIVTGHIWSPKNSRQRG-----DLOEKLKHAYSLRKEFP : 1205
CsRDR6c : PGSMDFADAWEHKSYDQLNGLLGQYKVREEEIVTGHIWSPKNSRQRG-----DLOEKLKHAYSLRKEFP : 1112
          g          d5i          a          k          y          1          y          ee          g          m          p          k          y          lrke

1340           *           1360           *           1380           *           1400
CsRDR1c : TFNRKEAASGVGDDVY---AKASAWYVYTHPRYWGCYNEGMN-----REHFLSFPWCYDRLIHIKRDK : 1140
CsRDR1a : SWFNTSGSESDAEDDVY-----AKASAWYVYTHPSWGRNEGTD-----REHFLSFPWCYDRLIHIKRKEK : 1131
CsRDR1b : TFNTSRATSDAEDDVY---AKASAWYVYTHPSWQYNGGMN-----DHDFLSFPWCYDRLIHIKRKEK : 1181
CsRDR2 : GWFESS-----CKADQQ-----KASAWYVYTHPSYCKES-----THCLGPPTLDGLLNIKSVO : 1143
CsRDR5a : LGAEFESPRNTDIYN-----ELAIYNITYDHAMGYENVKNCG-----FAWRWAGSALFKLHAIG : 805
CsRDR5b : ----- : -
CsRDR6a : QNEFKIS-DVSLDDEKNTLYEGASAWYVYTHPSWVKKSLEIQESNGTDQMLLSSWTAADYLARIKIRC : 635
CsRDR6b : QAFEKMGDFQDLSDAKNTMYERASAWYVYTHPSWVKKSLELHDSDGSGQMMVLSSWTAADYLARIKIRC : 1279
CsRDR6c : QAFEKMGDFQDLSDAKNTMYERASAWYVYTHPSWVKKSLELQESDGSGQMMVLSSWTAADYLARIKIRC : 1186
          f          dd          asawy          yhp          1          f          w          d          l          k

*           1420
CsRDR1c : SSI---RRALHSSLERQFSYGLS- : 1163
CsRDR1a : S-----RRLLHSSVEKO---SSGLSLG- : 1152
CsRDR1b : S-----RMALQLSSLORRQYGLSG- : 1202
CsRDR2 : S-----RKLSA----- : 1149
CsRDR5a : QSEKMEKPIVLPSVRELN--- : 826
CsRDR5b : ----- : -
CsRDR6a : RGIENFDSTKPINSLVYIADRI----- : 658
CsRDR6b : REIGNLDTTKPINSLAYADRDAIGN : 1306
CsRDR6c : REMGNLDTTKPINSLAYFADRDAIGY : 1213
          s

```

Supplementary Figure S2-a . The NJ phylogenetic tree of AGO family genes in 62 representative plant species.

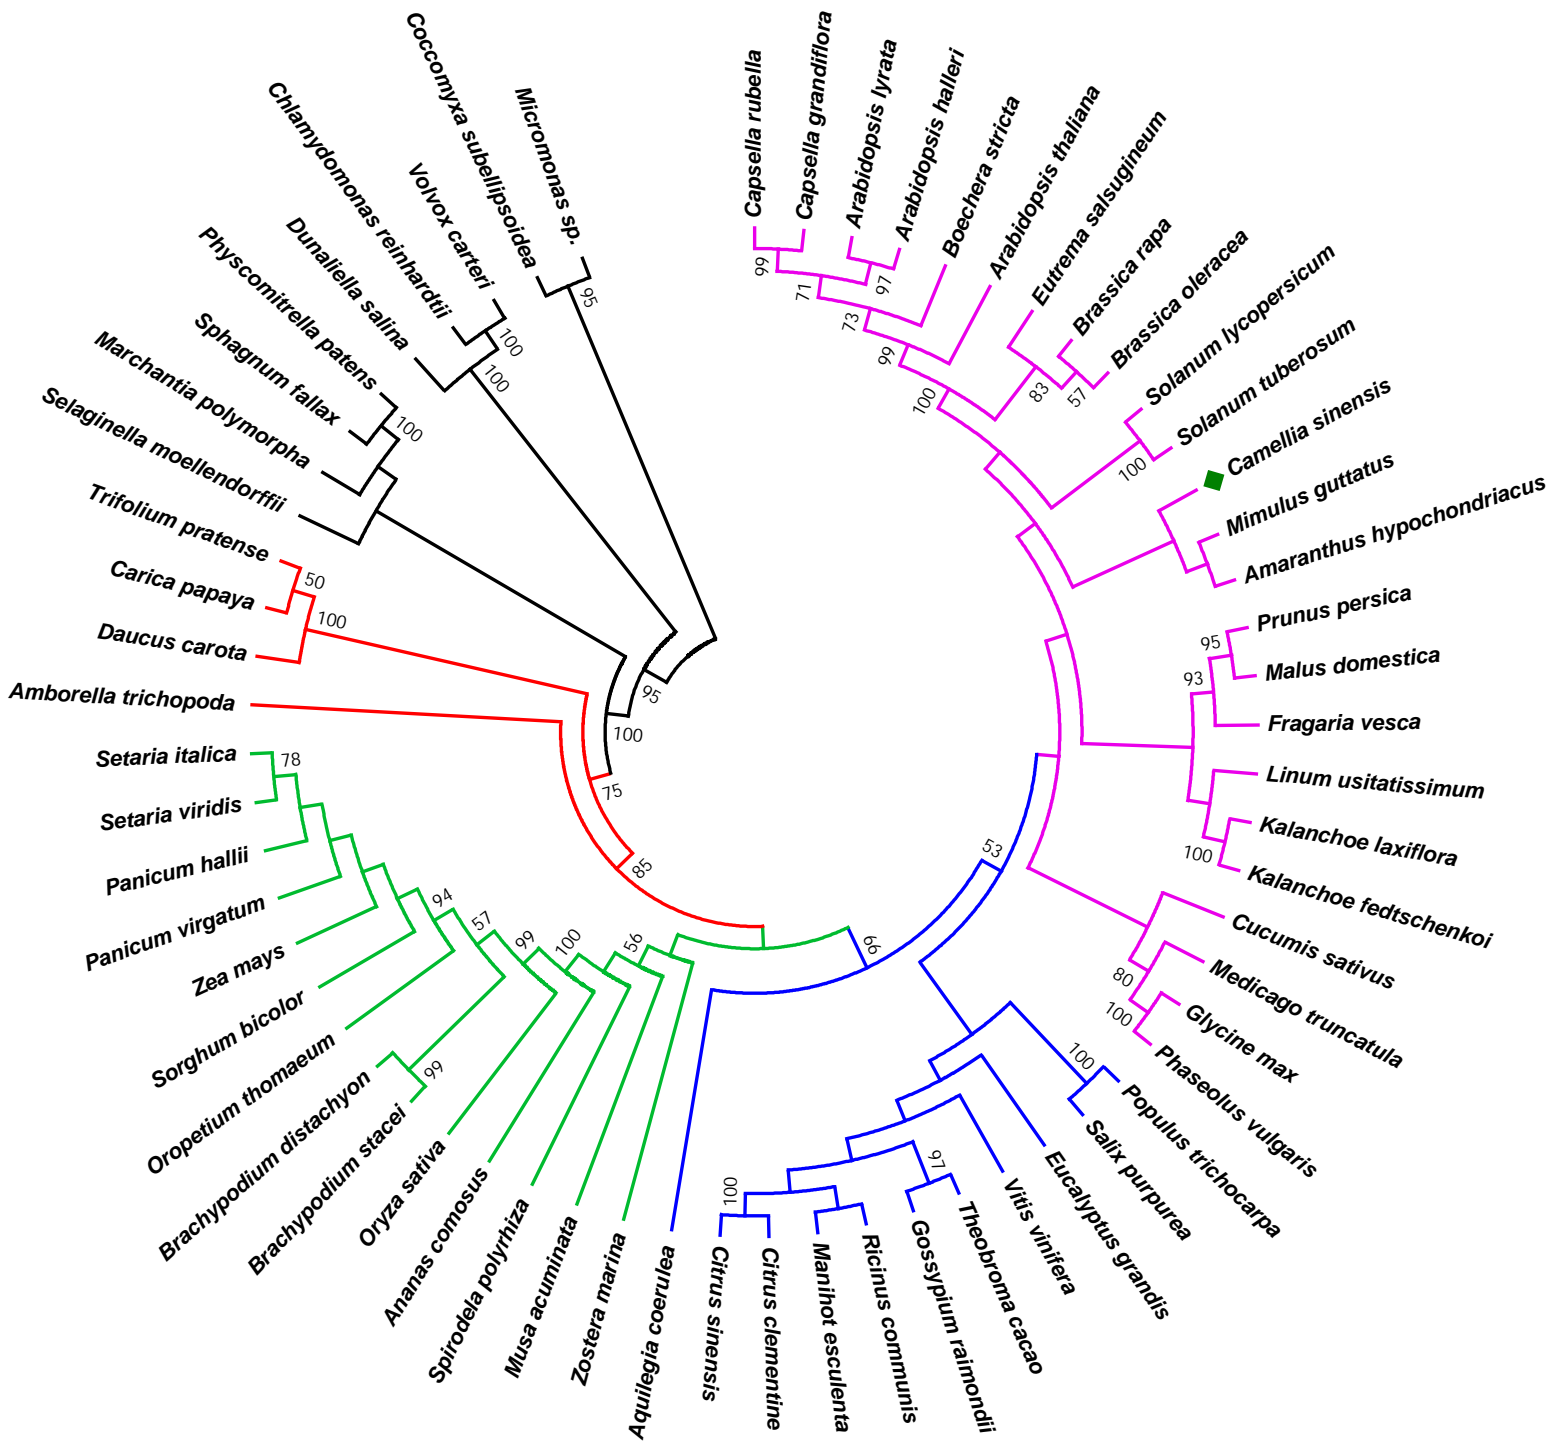

Supplementary Figure S2-b. The NJ phylogenetic tree of DCL family genes in 62 representative plant species

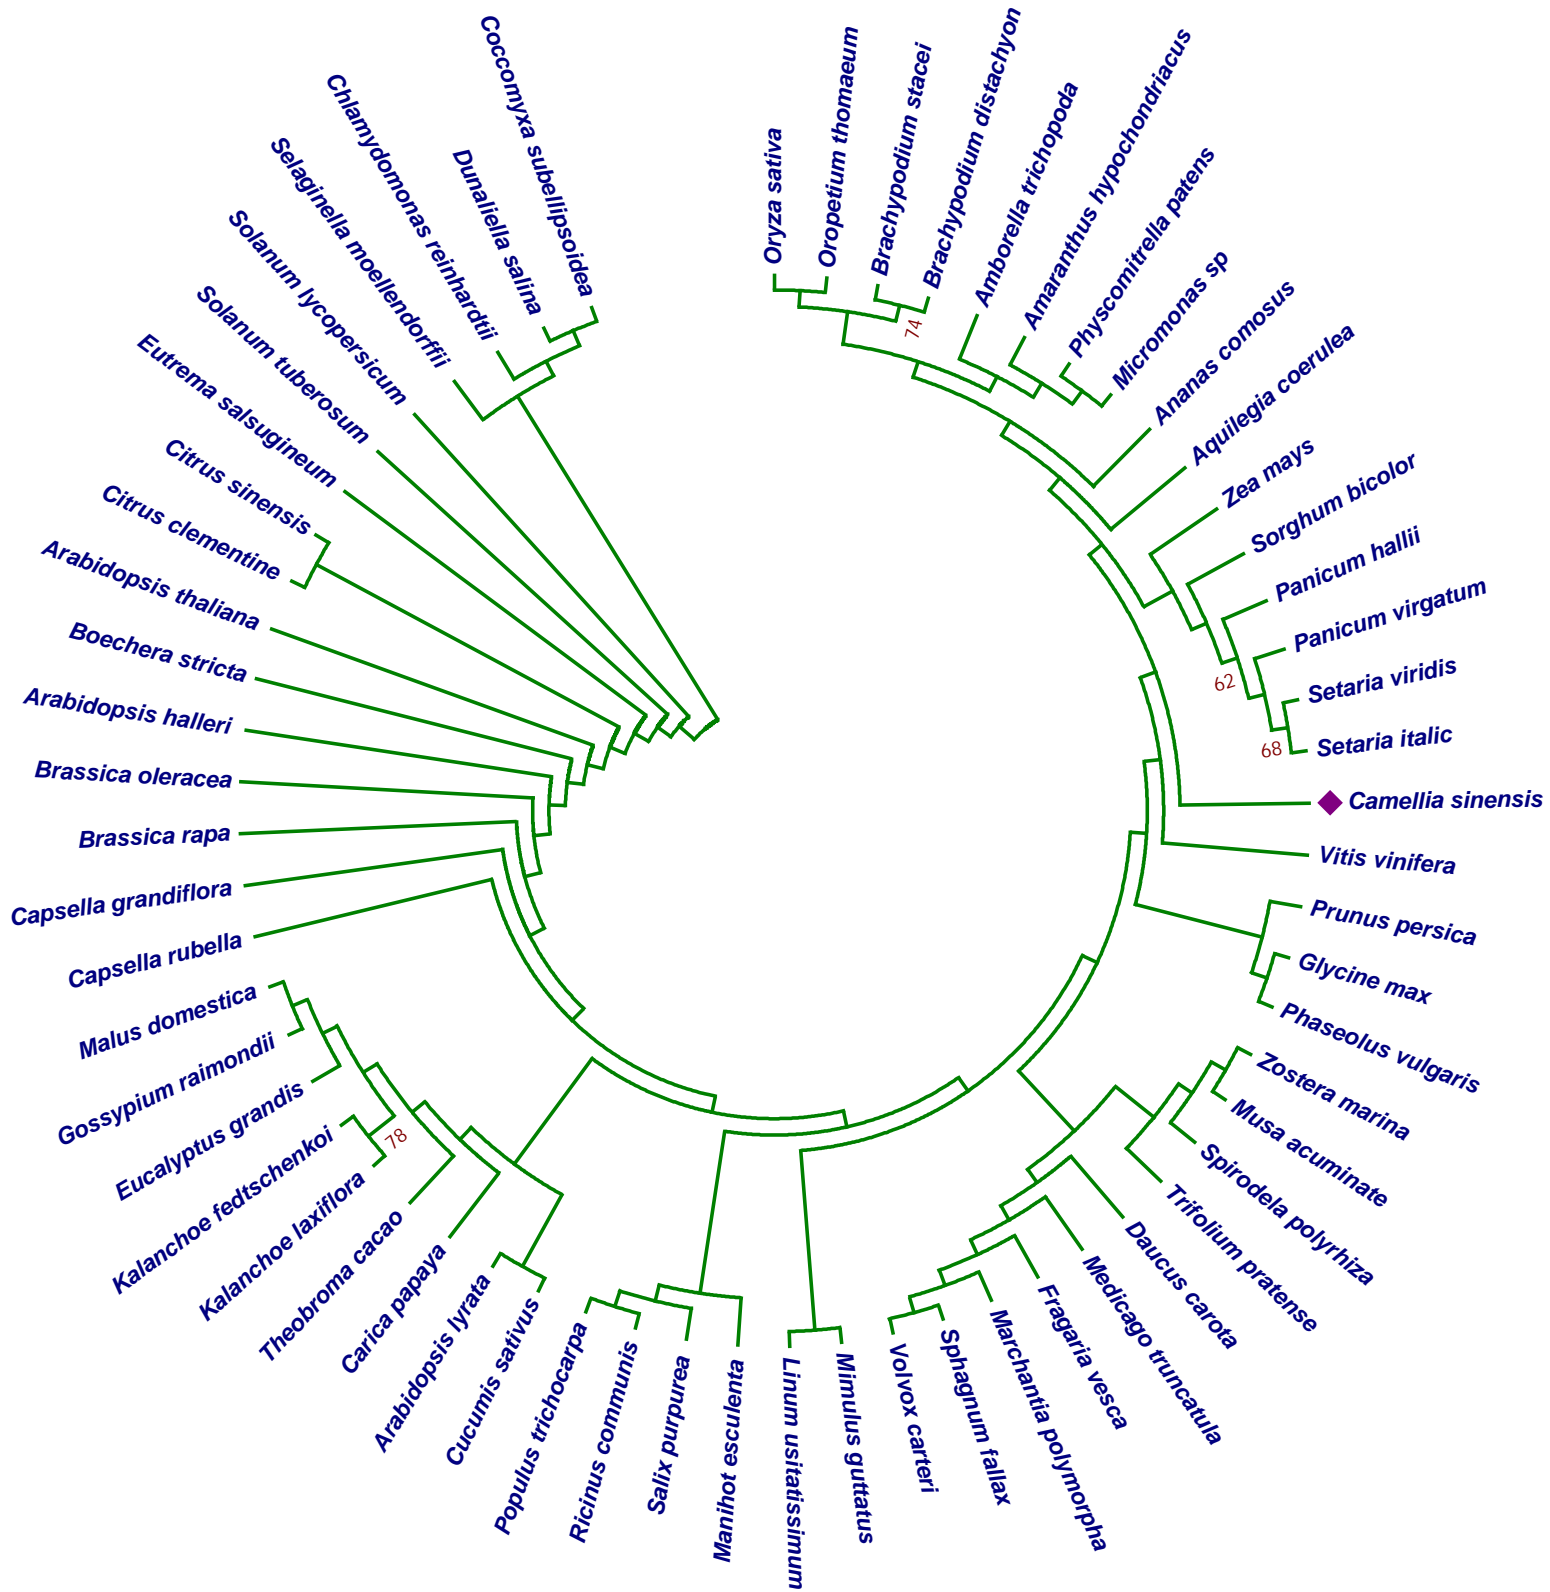

Supplementary Figure S2-c: The NJ phylogenetic tree of RDR family genes in 59 representative plant species

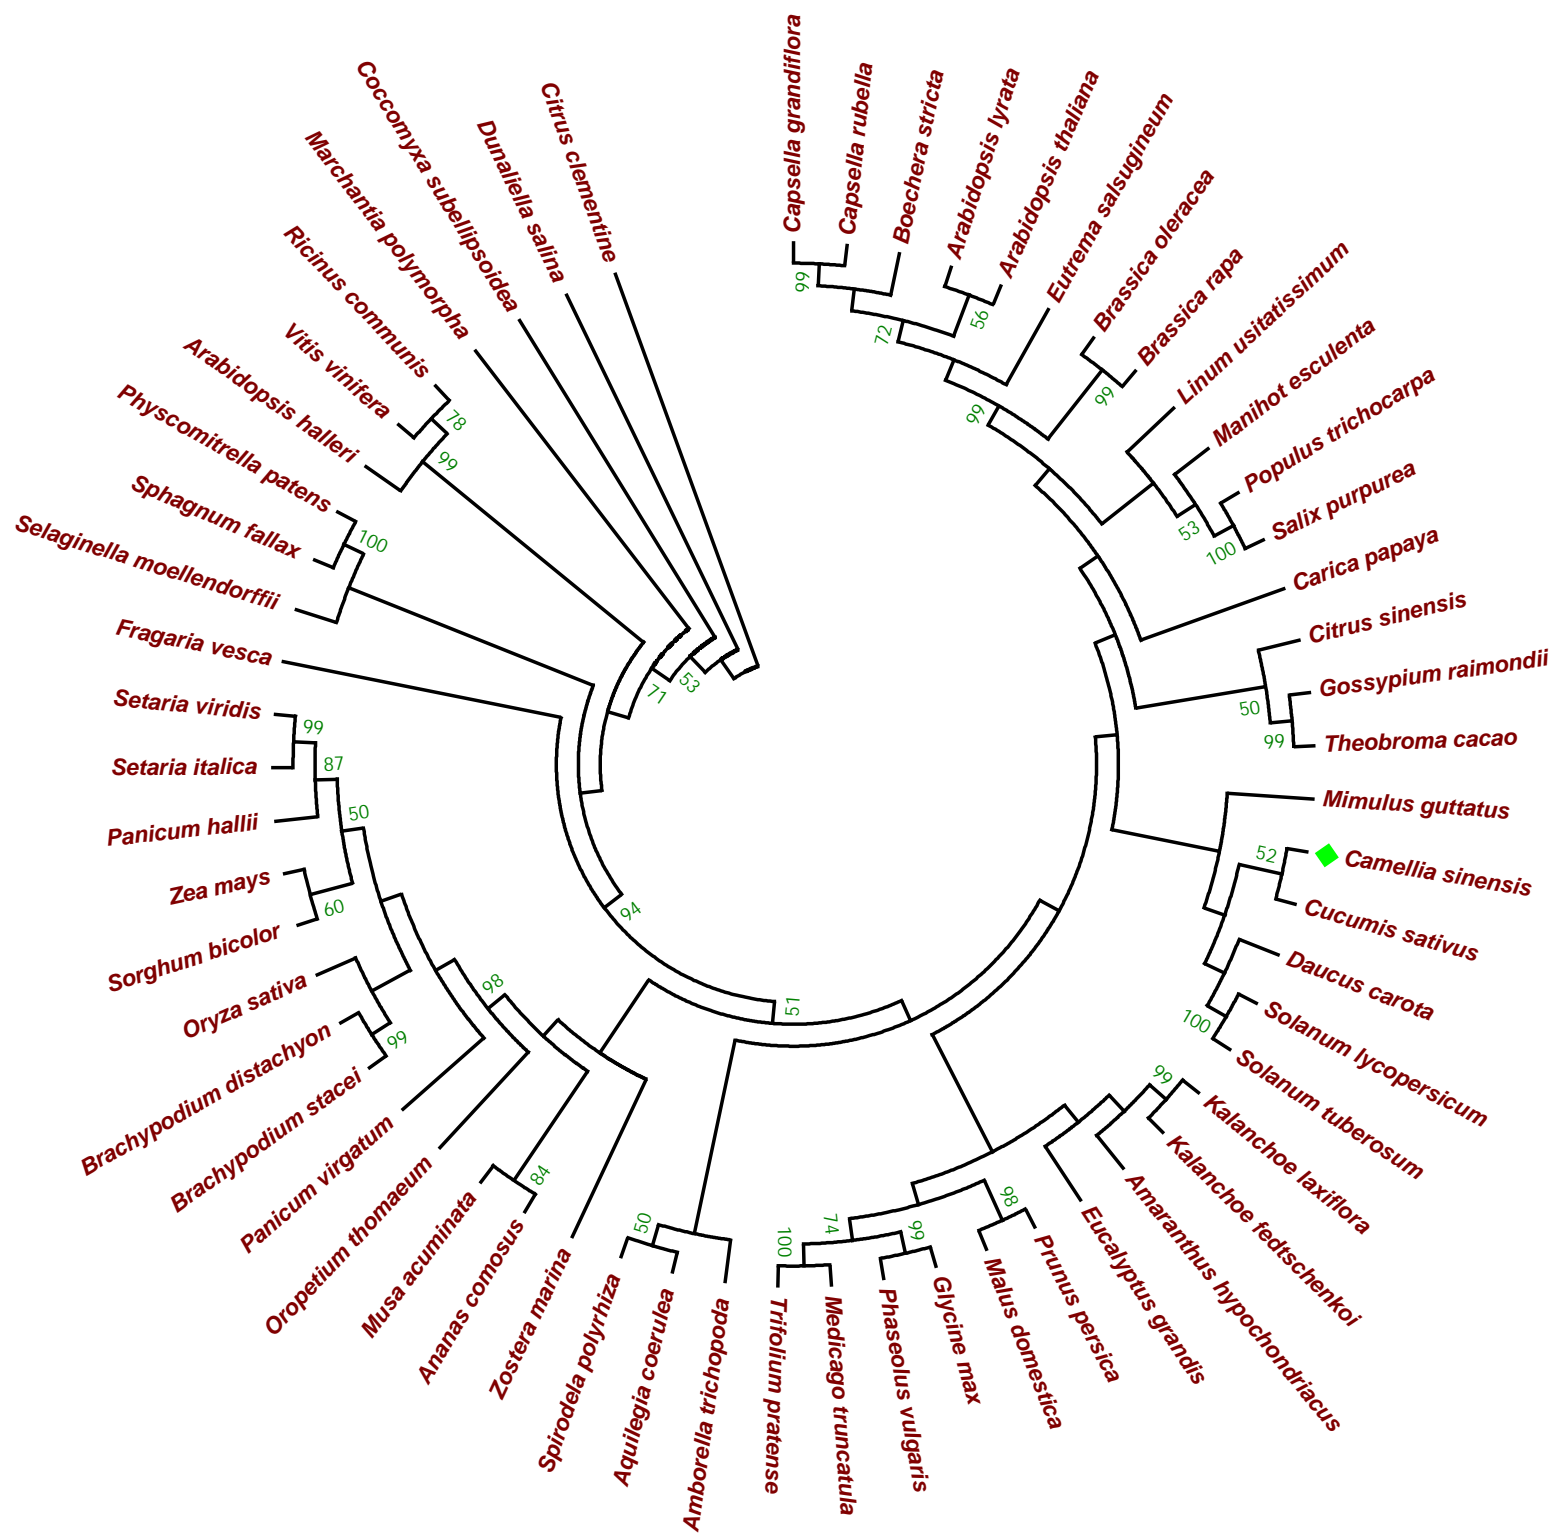

Supplementary Figure S3-a. Schematic diagram showing the logos of conserved motifs identified in CsAGO encoded proteins.

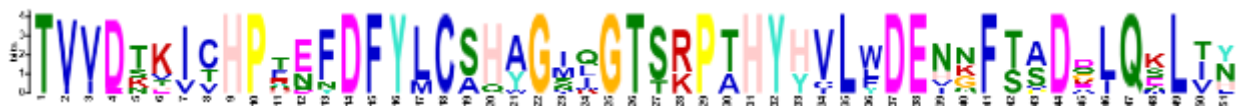

Motif 1

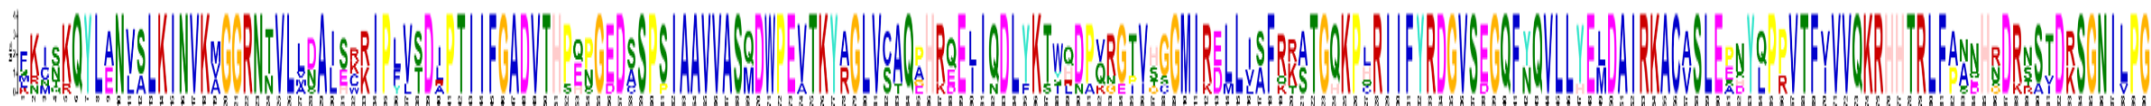

Motif 2

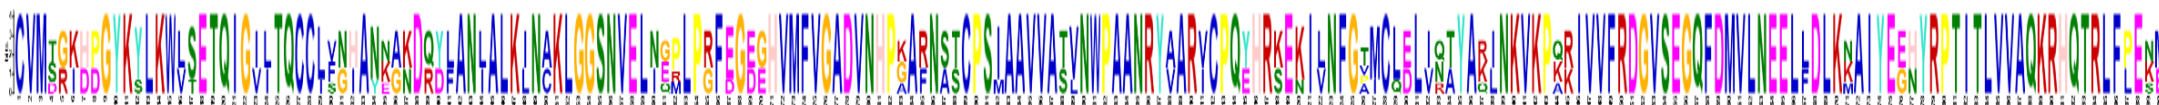

Motif 3

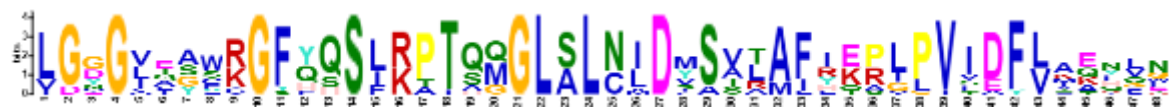

Motif 4

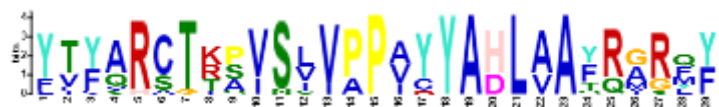

Motif 5

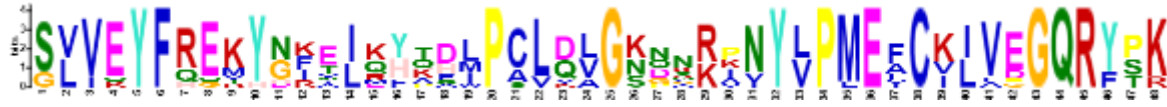

Motif 6

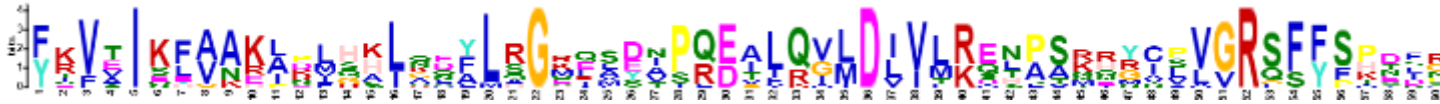

Motif 7

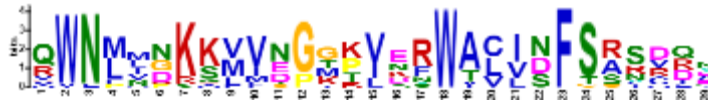

Motif 8

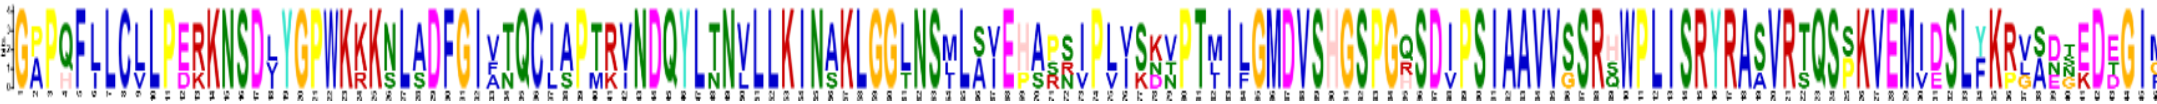

Motif 9

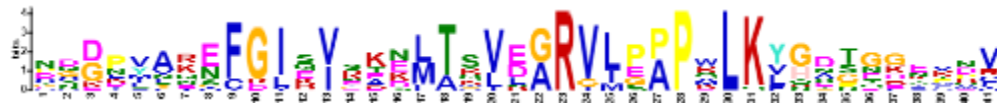

Motif 10



Supplementary Figure S3-b. Schematic diagram showing the logos of conserved motifs identified in CsDCL encoded proteins.

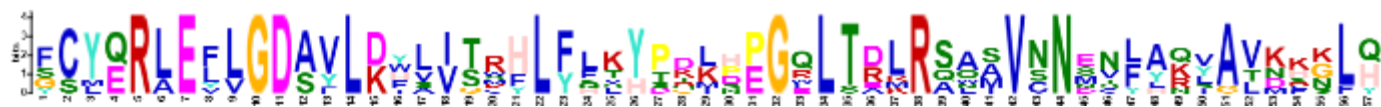

Motif 1

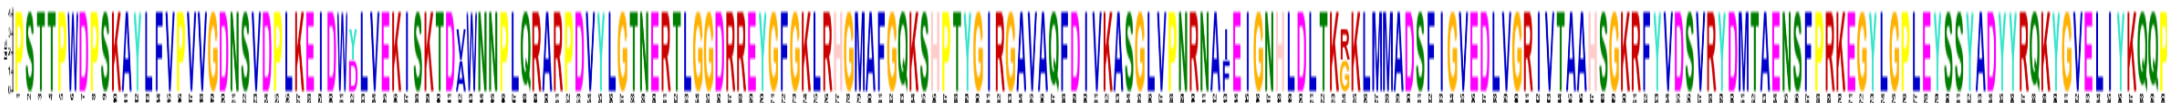

Motif 2

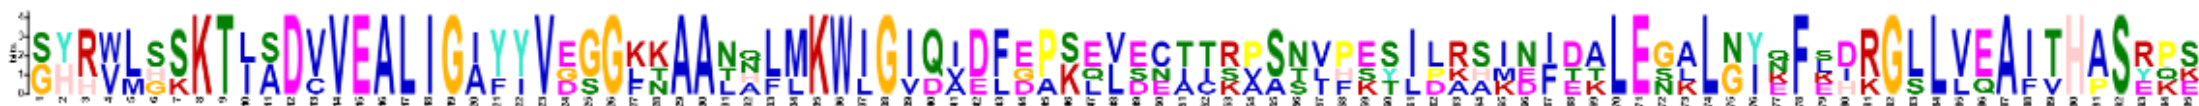

Motif 3

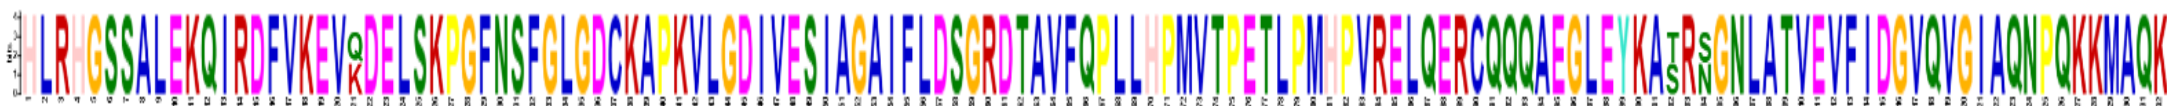

Motif 4

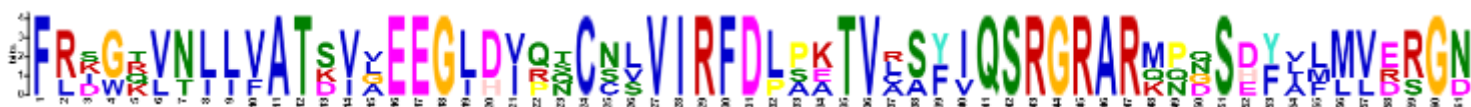

Motif 5

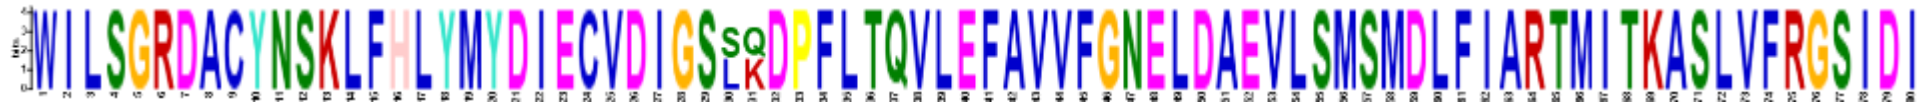

Motif 6

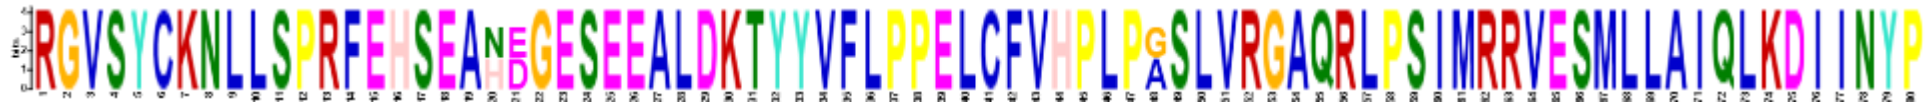

Motif 7

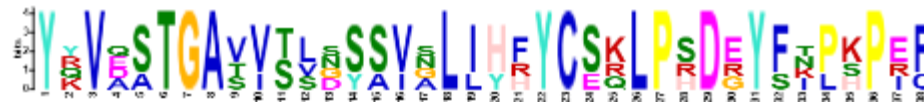

Motif 8

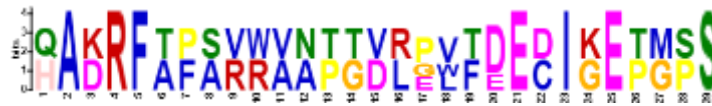

Motif 9

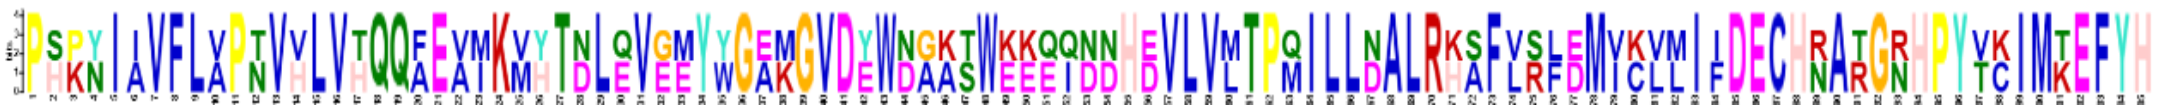

Motif 10

Supplementary Figure S3-c. Schematic diagram showing the logos of conserved motifs identified in CsRDR encoded proteins.

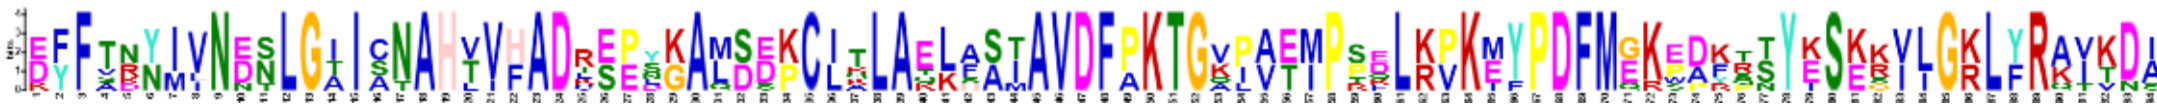

Motif 1

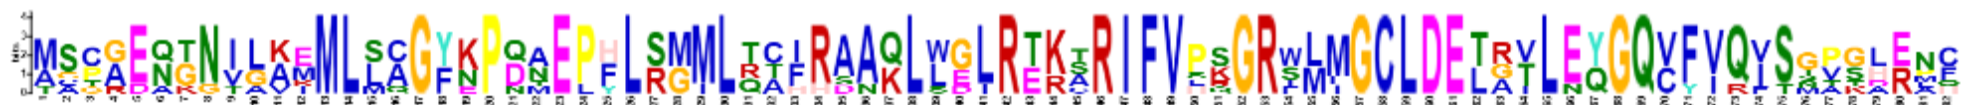

Motif 2

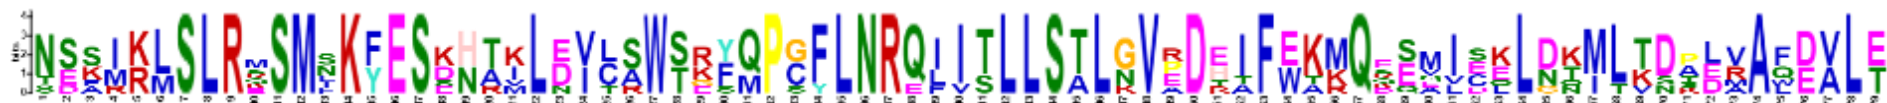

Motif 3

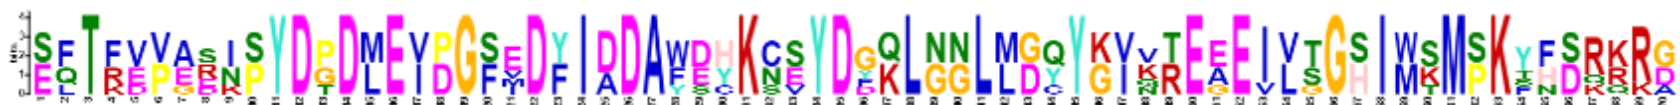

Motif 4

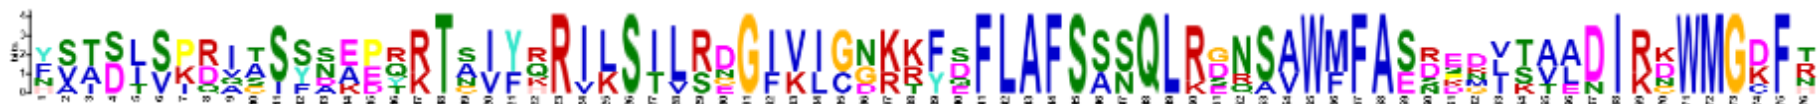

Motif 5

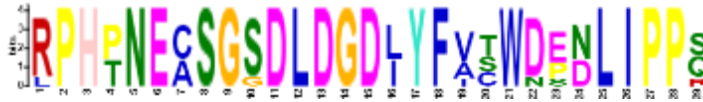

Motif 6

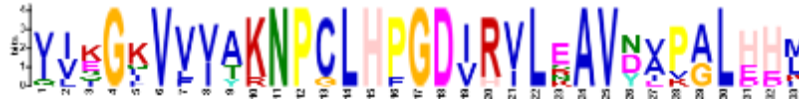

Motif 7

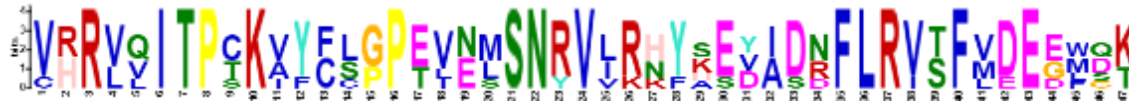

Motif 8

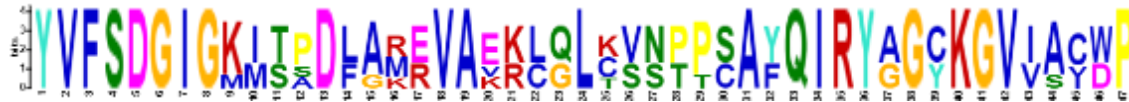

Motif 9

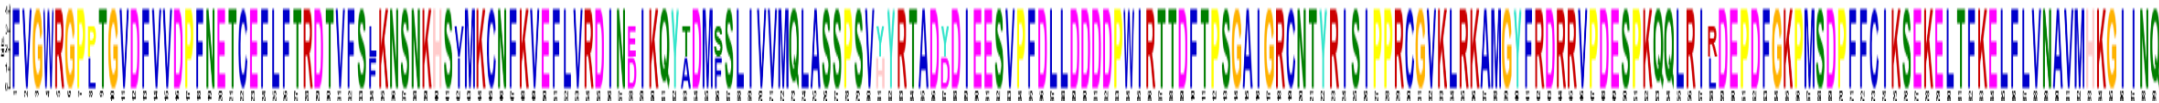

Motif 10

**Supplementary Table S1-a.** List of orthologous genes of AGOs from all plant lineages used to construct phylogenetic tree

| Sl. No. | Plant Species Name                | Protein ID                              | Score# | E value | Description *                             |
|---------|-----------------------------------|-----------------------------------------|--------|---------|-------------------------------------------|
| 1.      | <i>Marchantia polymorpha</i>      | Mapoly0001s0149.1                       | 1496.9 | 0.0     | Argonaute linker 1 domain                 |
| 2.      | <i>Physcomitrella patens</i>      | Pp3c1_35770V3.6                         | 1450.3 | 0.0     | Argonaute linker 1 domain                 |
| 3.      | <i>Sphagnum fallax</i>            | Sphfalx0001s0279.1                      | 1458.4 | 0.0     | Argonaute linker 1 domain                 |
| 4.      | <i>Selaginella moellendorffii</i> | 110151                                  | 1459.9 | 0.0     | Argonaute linker 1 domain                 |
| 5.      | <i>Ananas comosus</i>             | Aco011930.1                             | 1559.7 | 0.0     | Argonaute linker 1 domain                 |
| 6.      | <i>Amborella trichopoda</i>       | evm_27.model.AmTr_v1.0_scaffold00044.24 | 1547.7 | 0.0     | Argonaute linker 1 domain                 |
| 7.      | <i>Musa acuminata</i>             | GSMUA_AchrUn_randomT09260_001           | 1603.2 | 0.0     | Argonaute linker 1 domain                 |
| 8.      | <i>Spirodela polyrhiza</i>        | Spipo17G0036500                         | 1588.2 | 0.0     | Argonaute linker 1 domain                 |
| 9.      | <i>Zostera marina</i>             | Zosma25g01490.1                         | 1493.0 | 0.0     | Argonaute linker 1 domain                 |
| 10.     | <i>Brachypodium distachyon</i>    | Bradi5g18540.1                          | 1557.0 | 0.0     | Argonaute linker 1 domain                 |
| 11.     | <i>Brachypodium stacei</i>        | Brast09G173700.1                        | 1558.9 | 0.0     | Argonaute linker 1 domain                 |
| 12.     | <i>Oryza sativa</i>               | LOC_Os04g47870.2                        | 1565.4 | 0.0     | Argonaute linker 1 domain                 |
| 13.     | <i>Oropetium thomaeum</i>         | Oropetium_20150105_01399A               | 1533.1 | 0.0     | Argonaute linker 1 domain                 |
| 14.     | <i>Panicum hallii</i>             | Pahal.G01956.1                          | 1564.3 | 0.0     | Argonaute linker 1 domain                 |
| 15.     | <i>Panicum virgatum</i>           | Pavir.Ga01012.1                         | 1557.0 | 0.0     | Argonaute linker 1 domain                 |
| 16.     | <i>Setaria italica</i>            | Seita.7G201100.1                        | 1559.3 | 0.0     | Argonaute linker 1 domain                 |
| 17.     | <i>Setaria viridis</i>            | Sevir.7G213000.2                        | 1562.4 | 0.0     | Argonaute linker 1 domain                 |
| 18.     | <i>Sorghum bicolor</i>            | Sobic.006G181000.1                      | 1534.6 | 0.0     | Argonaute linker 1 domain                 |
| 19.     | <i>Zea mays</i>                   | GRMZM2G039455_T01                       | 1542.3 | 0.0     | Argonaute linker 1 domain                 |
| 20.     | <i>Aquilegia coerulea</i>         | Aqcoe3G009200.1                         | 1623.6 | 0.0     | Argonaute linker 1 domain                 |
| 21.     | <i>Amaranthus hypochondriacus</i> | AHYPO_012431-RA                         | 1648.6 | 0.0     | Argonaute linker 1 domain                 |
| 22.     | <i>Daucus carota</i>              | DCAR_027248                             | 1332.8 | 0.0     | Argonaute linker 1 domain                 |
| 23.     | <i>Mimulus guttatus</i>           | Migut.O00245.1                          | 1672.5 | 0.0     | Argonaute linker 1 domain                 |
| 24.     | <i>Solanum lycopersicum</i>       | Solyc06g072300.2.1                      | 1709.9 | 0.0     | ARGONAUTE 1                               |
| 25.     | <i>Solanum tuberosum</i>          | PGSC0003DMT400069313                    | 1708.4 | 0.0     | ARGONAUTE 1                               |
| 26.     | <i>Kalanchoe fedtschenkoi</i>     | Kaladp0053s0463.1                       | 1629.0 | 0.0     | Argonaute linker 1 domain                 |
| 27.     | <i>Kalanchoe laxiflora</i>        | Kalax.0373s0030.1                       | 1632.1 | 0.0     | Argonaute linker 1 domain                 |
| 28.     | <i>Eucalyptus grandis</i>         | Eucgr.K02304.1                          | 1674.1 | 0.0     | Argonaute linker 1 domain                 |
| 29.     | <i>Vitis vinifera</i>             | GSVIVT01029383001                       | 1689.9 | 0.0     | Argonaute linker 1 domain                 |
| 30.     | <i>Linum usitatissimum</i>        | Lus10031331                             | 1655.6 | 0.0     | Argonaute linker 1 domain                 |
| 31.     | <i>Manihot esculenta</i>          | Manes.02G219700.1                       | 1681.8 | 0.0     | Argonaute linker 1 domain                 |
| 32.     | <i>Populus trichocarpa</i>        | Potri.012G037100.1                      | 1681.0 | 0.0     | Argonaute linker 1 domain                 |
| 33.     | <i>Ricinus communis</i>           | 29677.m000188                           | 1707.6 | 0.0     | Protein with all the AGO specific domains |
| 34.     | <i>Salix purpurea</i>             | SapurV1A.0202s0350.1s                   | 1676.0 | 0.0     | Argonaute linker 1 domain                 |

|     |                                   |                              |        |          |                           |
|-----|-----------------------------------|------------------------------|--------|----------|---------------------------|
| 35. | <i>Citrus sinensis</i>            | orange1.lg001466m            | 1679.8 | 0.0      | Argonaute linker 1 domain |
| 36. | <i>Citrus clementina</i>          | Ciclev10018625m              | 1679.8 | 0.0      | Argonaute linker 1 domain |
| 37. | <i>Carica papaya</i>              | evm.model.supercontig_44.130 | 1434.5 | 0.0      | Argonaute linker 1 domain |
| 38. | <i>Gossypium raimondii</i>        | Gorai.008G294100.1           | 1663.7 | 0.0      | Argonaute linker 1 domain |
| 39. | <i>Theobroma cacao</i>            | Thecc1EG013468t2             | 1677.1 | 0.0      | Argonaute linker 1 domain |
| 40. | <i>Arabidopsis halleri</i>        | Araha.2117s0011.2            | 1574.7 | 0.0      | Argonaute linker 1 domain |
| 41. | <i>Arabidopsis lyrata</i>         | AL1G55040.t1                 | 1575.5 | 0.0      | Argonaute linker 1 domain |
| 42. | <i>Arabidopsis thaliana</i>       | AT1G48410.2                  | 1562.0 | 0.0      | Argonaute linker 1 domain |
| 43. | <i>Boechera stricta</i>           | Bostr.25219s0559.1           | 1578.5 | 0.0      | Argonaute linker 1 domain |
| 44. | <i>Brassica oleracea capitata</i> | Bol043177                    | 1545.8 | 0.0      | Argonaute linker 1 domain |
| 45. | <i>Brassica rapa</i>              | Brara.H00354.1               | 1552.3 | 0.0      | Argonaute linker 1 domain |
| 46. | <i>Capsella grandiflora</i>       | Cagra.1131s0020.1            | 1578.5 | 0.0      | Argonaute linker 1 domain |
| 47. | <i>Capsella rubella</i>           | Carubv10008158m              | 1581.2 | 0.0      | Argonaute linker 1 domain |
| 48. | <i>Eutrema salsugineum</i>        | Thhalv10011197m              | 1541.9 | 0.0      | Argonaute linker 1 domain |
| 49. | <i>Cucumis sativus</i>            | Cucsa.112480.1               | 1638.2 | 0.0      | Argonaute linker 1 domain |
| 50. | <i>Fragaria vesca</i>             | mrna09290.1-v1.0-hybrid      | 1578.5 | 0.0      | Argonaute linker 1 domain |
| 51. | <i>Glycine max</i>                | Glyma.16G217300.1            | 1662.1 | 0.0      | Argonaute linker 1 domain |
| 52. | <i>Malus domestica</i>            | MDP0000069525                | 1642.9 | 0.0      | Argonaute linker 2 domain |
| 53. | <i>Medicago trunculata</i>        | Medtr6g477980.2              | 1628.6 | 0.0      | Argonaute linker 1 domain |
| 54. | <i>Phaseolus vulgaris</i>         | Phvul.004G142900.1           | 1642.5 | 0.0      | Argonaute linker 1 domain |
| 55. | <i>Prunus persica</i>             | Prupe.5G241600.2             | 1689.5 | 0.0      | Argonaute linker 1 domain |
| 56. | <i>Trifolium pratense</i>         | Tp57577_TGAC_v2_mRNA26982    | 1261.5 | 0.0      | Argonaute linker 1 domain |
| 57. | <i>Chlamydomonas reinhardtii</i>  | Cre16.g689647.t1.1           | 434.9  | 2.5E-131 | Argonaute linker 1 domain |
| 58. | <i>Dunaliella salina</i>          | Dusal.0754s00004.1           | 449.9  | 3.6E-138 | Argonaute linker 1 domain |
| 59. | <i>Volvox carteri</i>             | Vocar.0052s0031.1            | 412.9  | 2.8E-123 | Argonaute linker 1 domain |
| 60. | <i>Coccomyxa subellipsoidea</i>   | 56024                        | 430.6  | 3.3E-130 | Argonaute linker 1 domain |
| 61. | <i>Micromonas sp. RCC299</i>      | 113410                       | 334.3  | 4.3E-96  | Argonaute linker 1 domain |

#Smith-Watermann alignment score (based on BLOSUM45, with gap opening and extension penalties of -12 and -2 respectively)

\*All protein sequences show presence of typical AGO specific domains viz. PAZ, PIWI, Argo-N, Argo-L1, Argo-Mid and Argo-L2. However, *Dunaliella salina* and *Volvox carteri* exhibited absence of miD domain, whereas PAZ domain was absent in *Micromonas sp.*

**Supplementary Table S1-b.** List of orthologous genes of DCLs from all plant lineages used to construct phylogenetic tree

| Sl. No. | Plant Species Name                | Protein ID                             | Score# | E value | Description *                    |
|---------|-----------------------------------|----------------------------------------|--------|---------|----------------------------------|
| 1.      | <i>Marchantia polymorpha</i>      | Mapoly0003s0222.1                      | 2016.1 | 0.0     | ENDORIBONUCLEASE DICER HOMOLOG 1 |
| 2.      | <i>Physcomitrella patens</i>      | Pp3c2_15900V3.1                        | 1979.5 | 0.0     | ENDORIBONUCLEASE DICER HOMOLOG 1 |
| 3.      | <i>Sphagnum fallax</i>            | Sphfalx0020s0155.1                     | 1958.3 | 0.0     | ENDORIBONUCLEASE DICER HOMOLOG 1 |
| 4.      | <i>Selaginella moellendorffii</i> | 86110                                  | 1793.5 | 0.0     | ENDORIBONUCLEASE DICER HOMOLOG 1 |
| 5.      | <i>Ananas comosus</i>             | Aco016650.1                            | 2366.3 | 0.0     | ENDORIBONUCLEASE DICER HOMOLOG 1 |
| 6.      | <i>Amborella trichopoda</i>       | evm_27.model.AmTr_v1.0_scaffold00018.3 | 2265.7 | 0.0     | ENDORIBONUCLEASE DICER HOMOLOG 1 |
| 7.      | <i>Musa acuminata</i>             | GSMUA_Achr8T12350_001                  | 1069.3 | 0.0     | ENDORIBONUCLEASE DICER HOMOLOG 1 |
| 8.      | <i>Spirodela polyrhiza</i>        | Spipo1G0078500                         | 2244.5 | 0.0     | ENDORIBONUCLEASE DICER HOMOLOG 1 |
| 9.      | <i>Zostera marina</i>             | Zosma109g00390.1                       | 2227.6 | 0.0     | ENDORIBONUCLEASE DICER HOMOLOG 1 |
| 10.     | <i>Brachypodium distachyon</i>    | Bradi1g77087.1                         | 2248.0 | 0.0     | ENDORIBONUCLEASE DICER HOMOLOG 1 |
| 11.     | <i>Brachypodium stacei</i>        | Brast02G020300.1                       | 2255.7 | 0.0     | ENDORIBONUCLEASE DICER HOMOLOG 1 |
| 12.     | <i>Oryza sativa</i>               | LOC_Os0302970.1                        | 2290.8 | 0.0     | ENDORIBONUCLEASE DICER HOMOLOG 1 |
| 13.     | <i>Oropetium thomaeum</i>         | Oropetium_20150105_22551A              | 2213.0 | 0.0     | ENDORIBONUCLEASE DICER HOMOLOG 1 |
| 14.     | <i>Panicum hallii</i>             | Pahal.I00170.1                         | 2259.6 | 0.0     | ENDORIBONUCLEASE DICER HOMOLOG 1 |
| 15.     | <i>Panicum virgatum</i>           | Pavir.Ib00062.1                        | 2255.3 | 0.0     | ENDORIBONUCLEASE DICER HOMOLOG 1 |
| 16.     | <i>Setaria italica</i>            | Seita.9G562200.1                       | 2248.4 | 0.0     | ENDORIBONUCLEASE DICER HOMOLOG 1 |
| 17.     | <i>Setaria viridis</i>            | Sevir.9G565900.1                       | 2252.3 | 0.0     | ENDORIBONUCLEASE DICER HOMOLOG 1 |
| 18.     | <i>Sorghum bicolor</i>            | Sobic.001527800.2                      | 2271.1 | 0.0     | ENDORIBONUCLEASE DICER HOMOLOG 1 |
| 19.     | <i>Zea mays</i>                   | GRMZM2G040762_T01                      | 1961.0 | 0.0     | ENDORIBONUCLEASE DICER HOMOLOG 1 |
| 20.     | <i>Aquilegia coerulea</i>         | Aqcoe5G472300.2                        | 2374.4 | 0.0     | ENDORIBONUCLEASE DICER HOMOLOG 1 |
| 21.     | <i>Amaranthus hypochondriacus</i> | AHYPO_01582-RA                         | 2272.3 | 0.0     | ENDORIBONUCLEASE DICER HOMOLOG 1 |
| 22.     | <i>Daucus carota</i>              | DCAR_022119                            | 2273.4 | 0.0     | ENDORIBONUCLEASE DICER HOMOLOG 1 |
| 23.     | <i>Mimulus guttatus</i>           | Migut.I00117.1                         | 2330.4 | 0.0     | ENDORIBONUCLEASE DICER HOMOLOG 1 |
| 24.     | <i>Solanum lycopersicum</i>       | Solyc10g005130.2.1                     | 2238.8 | 0.0     | ENDORIBONUCLEASE DICER HOMOLOG 1 |
| 25.     | <i>Solanum tuberosum</i>          | PGSC0003DMT400029301                   | 2269.2 | 0.0     | ENDORIBONUCLEASE DICER HOMOLOG 1 |
| 26.     | <i>Kalanchoe fedtschenkoi</i>     | Kaladp0072s0008.1                      | 1321.2 | 0.0     | ENDORIBONUCLEASE DICER HOMOLOG 1 |
| 27.     | <i>Kalanchoe laxiflora</i>        | Kalax.0054s0136.1                      | 2265.7 | 0.0     | ENDORIBONUCLEASE DICER HOMOLOG 1 |
| 28.     | <i>Eucalyptus grandis</i>         | Eucgr.D02653.1                         | 2424.1 | 0.0     | ENDORIBONUCLEASE DICER HOMOLOG 1 |
| 29.     | <i>Vitis vinifera</i>             | GSVIVT01027462001                      | 1863.2 | 0.0     | ENDORIBONUCLEASE DICER HOMOLOG 1 |

|     |                                   |                             |        |         |                                        |
|-----|-----------------------------------|-----------------------------|--------|---------|----------------------------------------|
| 30. | <i>Linum usitatissimum</i>        | Lus10005142bt               | 1635.2 | 0.0     | ENDORIBONUCLEASE DICER HOMOLOG 1       |
| 31. | <i>Manihot esculenta</i>          | Manes.05G015200.1           | 2449.5 | 0.0     | ENDORIBONUCLEASE DICER HOMOLOG 1       |
| 32. | <i>Populus trichocarpa</i>        | Potri.002G181400.1          | 2422.1 | 0.0     | ENDORIBONUCLEASE DICER HOMOLOG 1       |
| 33. | <i>Ricinus communis</i>           | 30076.m004468               | 2470.7 | 0.0     | ENDORIBONUCLEASE DICER HOMOLOG 1       |
| 34. | <i>Salix purpurea</i>             | SapurV1A.0003s0350.1        | 2400.6 | 0.0     | ENDORIBONUCLEASE DICER HOMOLOG 1       |
| 35. | <i>Citrus sinensis</i>            | orange1.1g000174m           | 2351.6 | 0.0     | ENDORIBONUCLEASE DICER HOMOLOG 1       |
| 36. | <i>Citrus clementina</i>          | Ciclev10018447m             | 2428.7 | 0.0     | ENDORIBONUCLEASE DICER HOMOLOG 1       |
| 37. | <i>Carica papaya</i>              | evm.model.supercontig_57.74 | 2153.6 | 0.0     | ENDORIBONUCLEASE DICER HOMOLOG 1       |
| 38. | <i>Gossypium raimondii</i>        | Gorai.001150400.1           | 2418.3 | 0.0     | ENDORIBONUCLEASE DICER HOMOLOG 1       |
| 39. | <i>Theobroma cacao</i>            | Thecc1EG005016t2            | 2441.8 | 0.0     | ENDORIBONUCLEASE DICER HOMOLOG 1       |
| 40. | <i>Arabidopsis halleri</i>        | Araha.2490s0029.1           | 2239.9 | 0.0     | ENDORIBONUCLEASE DICER HOMOLOG 1       |
| 41. | <i>Arabidopsis lyrata</i>         | AL1G11480.t1                | 2238.8 | 0.0     | ENDORIBONUCLEASE DICER HOMOLOG 1       |
| 42. | <i>Arabidopsis thaliana</i>       | AT1G01040.2                 | 2216.4 | 0.0     | ENDORIBONUCLEASE DICER HOMOLOG 1       |
| 43. | <i>Boechera stricta</i>           | Bostr.5325s0024.1           | 2231.5 | 0.0     | ENDORIBONUCLEASE DICER HOMOLOG 1       |
| 44. | <i>Brassica oleracea capitata</i> | Bol040724                   | 2245.3 | 0.0     | ENDORIBONUCLEASE DICER HOMOLOG 1       |
| 45. | <i>Brassica rapa</i>              | Brara.J00078.1              | 2253.8 | 0.0     | ENDORIBONUCLEASE DICER HOMOLOG 1       |
| 46. | <i>Capsella grandiflora</i>       | Cagra.1968s0049.1           | 2273.8 | 0.0     | ENDORIBONUCLEASE DICER HOMOLOG 1       |
| 47. | <i>Capsella rubella</i>           | Carubv10008073m             | 2273.8 | 0.0     | ENDORIBONUCLEASE DICER HOMOLOG 1       |
| 48. | <i>Eutrema salsugineum</i>        | Thhalv10006531m             | 2224.1 | 0.0     | ENDORIBONUCLEASE DICER HOMOLOG 1       |
| 49. | <i>Curcumis sativus</i>           | Cucsa.260100.1              | 2430.6 | 0.0     | ENDORIBONUCLEASE DICER HOMOLOG 1       |
| 50. | <i>Fragaria vesca</i>             | mrna18596.1-v1.0-hybrid     | 2333.5 | 0.0     | ENDORIBONUCLEASE DICER HOMOLOG 1       |
| 51. | <i>Glycine max</i>                | Glyma.19G261200.2           | 2417.1 | 0.0     | ENDORIBONUCLEASE DICER HOMOLOG 1       |
| 52. | <i>Malus domestica</i>            | MDP0000619907               | 199.5  | 1.7E-52 | DICER-LIKE PROTEIN 4                   |
| 53. | <i>Medicago trunculata</i>        | Medtr7g118350.1             | 2398.6 | 0.0     | ENDORIBONUCLEASE DICER HOMOLOG 1       |
| 54. | <i>Phaseolus vulgaris</i>         | Phvul.009G260000.1          | 2409.0 | 0.0     | ENDORIBONUCLEASE DICER HOMOLOG 1       |
| 55. | <i>Prunus persica</i>             | Prupe.2G200900.1            | 2419.0 | 0.0     | ENDORIBONUCLEASE DICER HOMOLOG 1       |
| 56. | <i>Trifolium pratense</i>         | Tp57577_TGAC_v2_mRNA4956    | 2400.9 | 0.0     | ENDORIBONUCLEASE DICER HOMOLOG 1       |
| 57. | <i>Chlamydomonas reinhardtii</i>  | Cre02.g141000.t1.1          | 97.1   | 3.5E-19 | ENDORIBONUCLEASE DICER HOMOLOG 1       |
| 58. | <i>Dunaliella salina</i>          | Dusal.0147s00002.1          | 74.7   | 2E-12   | ENDORIBONUCLEASE DICER HOMOLOG 1       |
| 59. | <i>Volvox carteri</i>             | Vocar.0003s0040.1           | 73.9   | 1E-13   | ENDORIBONUCLEASE DICER HOMOLOG 1       |
| 60. | <i>Coccomyxa subellipsoidea</i>   | 33474                       | 50.1   | 2E-6    | Ribonuclease III                       |
| 61. | <i>Micromonas sp. RCC299</i>      | 98380                       | 52.4   | 1.4E-6  | DEAD-BOX ATP-DEPENDENT RNA HELICASE 40 |

#Smith-Waterman alignment score (based on BLOSUM45, with gap opening and extension penalties of -12 and -2 respectively)



**Supplementary Table S1-c.** List of orthologous genes of RDRs from all plant lineages used to construct phylogenetic tree

| Sl. No. | Plant Species Name                | Protein ID                              | Score# | E value | Description *                  |
|---------|-----------------------------------|-----------------------------------------|--------|---------|--------------------------------|
| 1.      | <i>Marchantia polymorpha</i>      | Mapoly0151s0009.1                       | 592.0  | 0.0     | RNA-DEPENDENT RNA POLYMERASE   |
| 2.      | <i>Physcomitrella patens</i>      | Pp3c24_15800V3.6                        | 844.3  | 0.0     | RNA-DEPENDENT RNA POLYMERASE 1 |
| 3.      | <i>Sphagnum fallax</i>            | Sphfalx0166s0014.1                      | 873.6  | 0.0     | RNA-DEPENDENT RNA POLYMERASE 1 |
| 4.      | <i>Selaginella moellendorffii</i> | 150191                                  | 761.1  | 0.0     | RNA-DEPENDENT RNA POLYMERASE 1 |
| 5.      | <i>Ananas comosus</i>             | Aco002958.1                             | 1293.9 | 0.0     | RNA-DEPENDENT RNA POLYMERASE 1 |
| 6.      | <i>Amborella trichopoda</i>       | evm_27.model.AmTr_v1.0_scaffold00176.15 | 1251.9 | 0.0     | RNA-DEPENDENT RNA POLYMERASE 1 |
| 7.      | <i>Musa acuminata</i>             | GSMUA_Achr10T29960_001                  | 1115.5 | 0.0     | RNA-DEPENDENT RNA POLYMERASE 1 |
| 8.      | <i>Spirodela polyrhiza</i>        | Spipo15G0038000                         | 1087.4 | 0.0     | RNA-DEPENDENT RNA POLYMERASE 1 |
| 9.      | <i>Zostera marina</i>             | Zosma121g00800.1                        | 1154.0 | 0.0     | RNA-DEPENDENT RNA POLYMERASE 1 |
| 10.     | <i>Brachypodium distachyon</i>    | Bradi3g59910.1 (                        | 1122.8 | 0.0     | RNA-DEPENDENT RNA POLYMERASE 1 |
| 11.     | <i>Brachypodium stacei</i>        | Brast04G010200.1                        | 1189.1 | 0.0     | RNA-DEPENDENT RNA POLYMERASE 1 |
| 12.     | <i>Oryza sativa</i>               | LOC_Os02g50330.1                        | 922.5  | 0.0     | RNA-DEPENDENT RNA POLYMERASE 1 |
| 13.     | <i>Oropetium thomaeum</i>         | Oropetium_20150105_04127A               | 1180.2 | 0.0     | RNA-DEPENDENT RNA POLYMERASE 1 |
| 14.     | <i>Panicum hallii</i>             | Pahal.A03315.1                          | 1196.4 | 0.0     | RNA-DEPENDENT RNA POLYMERASE 1 |
| 15.     | <i>Panicum virgatum</i>           | Pavir.Aa00750.1                         | 1132.5 | 0.0     | RNA-DEPENDENT RNA POLYMERASE 1 |
| 16.     | <i>Setaria italica</i>            | Seita.1G312200.1                        | 1209.1 | 0.0     | RNA-DEPENDENT RNA POLYMERASE 1 |
| 17.     | <i>Setaria viridis</i>            | Sevir.1G318100.1                        | 1205.7 | 0.0     | RNA-DEPENDENT RNA POLYMERASE 1 |
| 18.     | <i>Sorghum bicolor</i>            | Sobic.004G246400.1                      | 1182.9 | 0.0     | RNA-DEPENDENT RNA POLYMERASE 1 |
| 19.     | <i>Zea mays</i>                   | GRMZM2G481730_T01                       | 1048.9 | 0.0     | RNA-DEPENDENT RNA POLYMERASE 1 |
| 20.     | <i>Aquilegia coerulea</i>         | Aqcoe6G285700.1                         | 1330.5 | 0.0     | RNA-DEPENDENT RNA POLYMERASE 1 |
| 21.     | <i>Amaranthus hypochondriacus</i> | AHYPO_003322-RA                         | 1256.5 | 0.0     | RNA-DEPENDENT RNA POLYMERASE 1 |
| 22.     | <i>Daucus carota</i>              | DCAR_030283                             | 1358.2 | 0.0     | RNA-DEPENDENT RNA POLYMERASE 1 |
| 23.     | <i>Mimulus guttatus</i>           | Migut.L01176.1                          | 1432.2 | 0.0     | RNA-DEPENDENT RNA POLYMERASE 1 |
| 24.     | <i>Solanum lycopersicum</i>       | Solyc05g007510.2.1                      | 1397.5 | 0.0     | RNA-DEPENDENT RNA POLYMERASE 1 |
| 25.     | <i>Solanum tuberosum</i>          | PGSC0003DMT400080319d                   | 1384.4 | 0.0     | RNA-DEPENDENT RNA POLYMERASE 1 |
| 26.     | <i>Kalanchoe fedtschenkoi</i>     | Kaladp0036s0212.1                       | 1299.3 | 0.0     | RNA-DEPENDENT RNA POLYMERASE 1 |
| 27.     | <i>Kalanchoe laxiflora</i>        | Kalax.0097s0091.1                       | 1310.8 | 0.0     | RNA-DEPENDENT RNA POLYMERASE 1 |
| 28.     | <i>Eucalyptus grandis</i>         | Eucgr.G02093.1                          | 1325.8 | 0.0     | RNA-DEPENDENT RNA POLYMERASE 1 |
| 29.     | <i>Vitis vinifera</i>             | GSVIVT01007792001                       | 807.0  | 0.0     | RNA-DEPENDENT RNA POLYMERASE 2 |

|     |                                   |                              |        |          |                                |
|-----|-----------------------------------|------------------------------|--------|----------|--------------------------------|
| 30. | <i>Linum usitatissimum</i>        | Lus10019164                  | 1356.7 | 0.0      | RNA-DEPENDENT RNA POLYMERASE 1 |
| 31. | <i>Manihot esculenta</i>          | Manes.15G135600.1            | 1445.3 | 0.0      | RNA-DEPENDENT RNA POLYMERASE 1 |
| 32. | <i>Populus trichocarpa</i>        | Potri.008G36100.1            | 1441.8 | 0.0      | RNA-DEPENDENT RNA POLYMERASE 1 |
| 33. | <i>Ricinus communis</i>           | 30147.m013981                | 780.4  | 0.0      | RNA-DEPENDENT RNA POLYMERASE 2 |
| 34. | <i>Salix purpurea</i>             | Solanum SapurV1A.0015s0570.1 | 1387.1 | 0.0      | RNA-DEPENDENT RNA POLYMERASE 1 |
| 35. | <i>Citrus sinensis</i>            | orange1.1g002586m            | 1240.3 | 0.0      | RNA-DEPENDENT RNA POLYMERASE 1 |
| 36. | <i>Citrus clementina</i>          | Ciclev10007331m              | 95.9   | 6E-18    | RNA-DEPENDENT RNA POLYMERASE   |
| 37. | <i>Carica papaya</i>              | evm.model.supercontig_2.177  | 955.3  | 0.0      | RNA-DEPENDENT RNA POLYMERASE 1 |
| 38. | <i>Gossypium raimondii</i>        | Gorai.013G029000.1           | 1397.1 | 0.0      | RNA-DEPENDENT RNA POLYMERASE 1 |
| 39. | <i>Theobroma cacao</i>            | Thecc1EG011292t1             | 1387.9 | 0.0      | RNA-DEPENDENT RNA POLYMERASE 1 |
| 40. | <i>Arabidopsis halleri</i>        | Araha.9628s0001.1            | 645.2  | 0.0      | RNA-DEPENDENT RNA POLYMERASE 2 |
| 41. | <i>Arabidopsis lyrata</i>         | AL1G26820.t1                 | 1332.8 | 0.0      | RNA-DEPENDENT RNA POLYMERASE 1 |
| 42. | <i>Arabidopsis thaliana</i>       | AT1G14790.1                  | 1322.8 | 0.0      | RNA-DEPENDENT RNA POLYMERASE 1 |
| 43. | <i>Boechera stricta</i>           | Bostr.0124s0180.1            | 1250.7 | 0.0      | RNA-DEPENDENT RNA POLYMERASE 1 |
| 44. | <i>Brassica oleracea capitata</i> | Bol038076                    | 1315.1 | 0.0      | RNA-DEPENDENT RNA POLYMERASE 1 |
| 45. | <i>Brassica rapa</i>              | Brara.F01003.1               | 1314.7 | 0.0      | RNA-DEPENDENT RNA POLYMERASE 1 |
| 46. | <i>Capsella grandiflora</i>       | Cagra.3501s0013.1            | 1340.1 | 0.0      | RNA-DEPENDENT RNA POLYMERASE 1 |
| 47. | <i>Capsella rubella</i>           | Carubv10008144m              | 1337.0 | 0.0      | RNA-DEPENDENT RNA POLYMERASE 1 |
| 48. | <i>Eutrema salsugineum</i>        | Thhalv10006629m              | 1307.4 | 0.0      | RNA-DEPENDENT RNA POLYMERASE 1 |
| 49. | <i>Cucumis sativus</i>            | Cucsa.143700.1               | 1340.1 | 0.0      | RNA-DEPENDENT RNA POLYMERASE 1 |
| 50. | <i>Fragaria vesca</i>             | mrna06498.1-v1.0-hybrid      | 1152.1 | 0.0      | RNA-DEPENDENT RNA POLYMERASE 1 |
| 51. | <i>Glycine max</i>                | Glyma.02G086100.1            | 1341.3 | 0.0      | RNA-DEPENDENT RNA POLYMERASE 1 |
| 52. | <i>Malus domestica</i>            | MDP0000475729                | 1335.1 | 0.0      | RNA-DEPENDENT RNA POLYMERASE 1 |
| 53. | <i>Medicago trunculata</i>        | Medtr1g032630.1              | 1335.1 | 0.0      | RNA-DEPENDENT RNA POLYMERASE 1 |
| 54. | <i>Phaseolus vulgaris</i>         | Phvul.003G016600.2           | 1295.8 | 0.0      | RNA-DEPENDENT RNA POLYMERASE 1 |
| 55. | <i>Prunus persica</i>             | Prupe.1G334600.2             | 1357.8 | 0.0      | RNA-DEPENDENT RNA POLYMERASE   |
| 56. | <i>Trifolium pratense</i>         | Tp57577_TGAC_v2_mRNA38119    | 1272.3 | 0.0      | RNA-DEPENDENT RNA POLYMERASE 1 |
| 57. | <i>Dunaliella salina</i>          | Dusal.0696s00003.1           | 196.4  | 1E-51    | RNA-DEPENDENT RNA POLYMERASE   |
| 58. | <i>Coccomyxa subellipsoidea</i>   | 20637                        | 486.9  | 1.5E-155 | RNA-DEPENDENT RNA POLYMERASE   |

#Smith-Watermann alignment score (based on BLOSUM45, with gap opening and extension penalties of -12 and -2 respectively)

**Supplementary Table S2-a.** Annotation of conserved MEME motifs identified in CsAGO proteins.

| Motif No. | Width | Sequence                                                                                                                                                                                                                  | e-value  | Pfam Annotation |
|-----------|-------|---------------------------------------------------------------------------------------------------------------------------------------------------------------------------------------------------------------------------|----------|-----------------|
| 1         | 51    | TVVDTKICHPTEFDLYLCSHAGIQGTSRPTHYHVLWDENNFTA<br>DDLQKLIY                                                                                                                                                                   | 2.2e-545 | Piwi domain     |
| 2         | 200   | FKISKQYLANVSLKINVKMGGRRNTVLLDAJSKRIPLVSDIPTIIFG<br>ADVTHPZPGEDSSPSIAAVVASQDWPEVTKYAGLVCAQP<br>HRZEJIQDLYKTWQDPQRGTVHGGMIRELLISFRKATGQKPLRII<br>FYRDGVSEGGFYQVLLYELDAIRKACASLEPNYQPPVTFVVVQ<br>KRHHTRLFAANHRDRNSTDRSGNILPG | 1.2e-787 | Piwi domain     |
| 3         | 200   | CVMSGKHPGYKYLKWLSETQIGIJTQCCLFNHANKAKDQYLAN<br>JALKINAKLGGSNVELNEPLPRFEGEGHVMFVGADVNHPGARN<br>STCPSIAAVVATVNWPAANRYAARVCPQYHRKEKILNFGTMCL<br>ELIQTYAKINKVKPKRIVVFRDGVSEGGQFDMVLNEELDLKKAI<br>YEEHYRPTITLVVAQKRHQTRLPENM   | 4.1e-518 | Piwi domain     |
| 4         | 48    | LGGGVEAWRGFYQSLRPTQQGLSLNJDMSVTAFIGEPLPVIDFLA<br>ZNLN                                                                                                                                                                     | 1.4e-356 | Argo-L1 domain  |
| 5         | 29    | YTYARCTKPVSLVPPAYYAHLAAYRARQY                                                                                                                                                                                             | 1.8e-242 | Unknown         |
| 6         | 48    | SVVEYFREKYNKEJKYTDLPCLDLGKNNRPNYLPMEFCKJVEG<br>QRYPK                                                                                                                                                                      | 2.4e-306 | PAZ domain      |
| 7         | 60    | FKVTIKFAAKLDLHKLKEYLRGKQSDIPQEALQVLDJVLRENPS<br>KRYCPVGRSFFSPDFR                                                                                                                                                          | 1.2e-342 | Argo-N domain   |
| 8         | 29    | QWNLLNKKVNVGGKVERWACINFSRSDQN                                                                                                                                                                                             | 3.8e-225 | Unknown         |
| 9         | 146   | GPPQFLLCLLPERKNSDJYGPWKKKNLADFGIVTQCIAPTRVND<br>QYLTNVLLKINAKLGGNSMLAIEHAPSIPLISKVPTMILGMDVS<br>HGSPGQSDIPSIAAVVSSRHWPLISRYRASVRTQSPKVEMIDSLY<br>KRVADSEDEGIM                                                             | 1.2e-207 | Piwi domain     |
| 10        | 41    | NDDPVAKEFGIEVSKELTSVEGRVLPPLPKYGBTGGEVNV                                                                                                                                                                                  | 1.2e-200 | Argo-L2 domain  |

**Supplementary Table S2-b.** Annotation of conserved MEME motifs identified in CsDCL proteins.

| Motif No. | Width | Sequence                                                                                                                                                                                                               | e-value  | Pfam Annotation            |
|-----------|-------|------------------------------------------------------------------------------------------------------------------------------------------------------------------------------------------------------------------------|----------|----------------------------|
| 1         | 57    | FCYZRLEFLGDAVLDYLITRHLFLKYPDLHPGQLTLRSAAVNN<br>ENFAKVAVKKGLH                                                                                                                                                           | 3.9e-157 | RNaseIII domain            |
| 2         | 200   | PSSTPWDPASKAYLFPVVGDNVDPKLEIDWDLVEKISKTDVW<br>NNPLQRARPDVYLGNTERTLGGDRREYGFGLRHGMAFGQKS<br>HPTYGIRGAVAQFDIVKASGLVPNRNAFEIGNHLDLTKGKLM<br>ADSFIVGVEDLVGRIVTAAHSGKRFYVDSVRYDMTAENSFPRKE<br>GYLGPLEYSSYADYYRQKYGVELIYKQQP | 1.0e-089 | PAZ domain                 |
| 3         | 98    | GHRWLSSKTJADVVEALIGAYYVEGGKKAANQLMKWIGIQIDF<br>EPKELECTTRPSNVPEILRSINFDALEGALGYEFKDRGLLVEAIT<br>HASRPSSGV                                                                                                              | 4.2e-062 | Unknown                    |
| 4         | 132   | HLRHGSSALEKQIRDFVKEVKDELSKPGFNSFGLGDCKAPKVL<br>GDIVESIAGAIFLDSGRDTAVFQPLLHPMVTPELPMHPVRELQE<br>RCQQQAEGLEYKASRNGNLATVEVFIDGVQVGIAQNPQKKMA<br>QK                                                                        | 2.7e-053 | Unknown                    |
| 5         | 61    | FRKKGKVNLLVATSVAEGLDIQSCNLVIRFDLPKTVASYIQSRG<br>RAMPDSDYILMVERGN                                                                                                                                                       | 2.9e-051 | Helicase C-terminal domain |
| 6         | 80    | WILSGRDACYNSKLFHLYMYDIECVDIGSLKDPFLTQVLEFAVV<br>FGNELDAEVLMSMDLFIARTMITKASLVFRGSIDI                                                                                                                                    | 2.9e-031 | Unknown                    |
| 7         | 80    | RGVSYCKNLLSPFEHSEANEGESEALDKTYVFLPPELFCVH<br>PLPGSLVRGAQRLPSIMRRVESMLLAIQLKDIINYP                                                                                                                                      | 5.0e-027 | PAZ domain                 |
| 8         | 38    | YKVESTGAVVSLNSSVGLIHFYCSKLPSEYFTPKPEF                                                                                                                                                                                  | 5.2e-025 | Unknown                    |
| 9         | 29    | QADRFAPAVVWVAPGDRPVTDDEDIGEPGPS                                                                                                                                                                                        | 7.3e-020 | Unknown                    |
| 10        | 105   | PHKNIIIVLVPNVVLVHQQFEVIKMHTDLZVEEYWGEKGVDEW<br>DGKSWEZQDDHEVLVLTQPILLDALRKAFLRFEMICLLIFDEC<br>HRARGRHPYVCIMKEFYH                                                                                                       | 1.8e-019 | DEAD box helicase          |

**Supplementary Table S2-c.** Annotation of conserved MEME motifs identified in CsRDR proteins.

| <b>Motif No.</b> | <b>Width</b> | <b>Sequence</b>                                                                                                                                                                                                     | <b>e-value</b> | <b>Pfam Annotation</b> |
|------------------|--------------|---------------------------------------------------------------------------------------------------------------------------------------------------------------------------------------------------------------------|----------------|------------------------|
| 1                | 94           | EFFTNYIVNDSLGIICNAHVVHADREPYKALSEKCJTLAELASIA<br>VDFPKTGVP AEMPSELKPKEYPDFMEKEDKTSYESKKVLGKLY<br>RAIKDA                                                                                                             | 3.0e-258       | RdRP domain            |
| 2                | 82           | MSCGENGNILAEMLLAGYKPDAEPFLSMMLTCFRAAQLWGLR<br>TKSRIFVPSGRWLMGCLDETRVLEYGQVVFQISGPGLENC                                                                                                                              | 2.7e-226       | RdRP domain            |
| 3                | 79           | NSSIKLSLRMSMSKFESKHTKLDVLSWSRYQPGFLNRQIITLLST<br>LGPVDEIFEKMQEEMIEKLDKMLTDPEVAFDVLE                                                                                                                                 | 7.1e-193       | RdRP domain            |
| 4                | 70           | EFTFEPASIPYDPDLEIPGFEDYIDDAWDHKCSYDGKLGGLLQ<br>YGIKTEEEILTGHIWSMPKYFDRKRG                                                                                                                                           | 3.9e-145       | Unknown                |
| 5                | 76           | YSTDJSPRIASYNPRRTAIYRRILSILRDGIVIGNKKFDLAFSS<br>QLRDNSAWMFASDEDITAADIRDWMGDFR                                                                                                                                       | 2.2e-130       | RdRP domain            |
| 6                | 29           | RPHPNECSGSDLDGDJYFVTWDEBLIPPQ                                                                                                                                                                                       | 7.3e-110       | RdRP domain            |
| 7                | 33           | VIKGVVVAKNPCLHPGDIRVLEAVDVPALHHL                                                                                                                                                                                    | 2.0e-109       | RdRP domain            |
| 8                | 47           | VHRVQITPCKVYFLGPEVEMSNRVJRHYKEYIDNFLRVSFVDEE<br>WDK                                                                                                                                                                 | 2.3e-096       | RdRP domain            |
| 9                | 47           | YVFSDGIGKITPDLAREVAEKLQLKVNPPSAYQIRYAGCKGVIA<br>CWP                                                                                                                                                                 | 9.3e-092       | RdRP domain            |
| 10               | 200          | FVGWRGPPTGVDFVDPFNETCEFLFTRDTVFSFKNSNKHSIMK<br>CNFKVEFLVRDINEIKYADMFLIVVMQLASSPSVHYRTADD<br>DIEESVPFDLLDDDDPWIRTTDFTPSGAIGRCNTYRISIPRCGVK<br>LRKAMGYFRDRRVPDESPKQLRIRDEPDFGKMSDPFFCIKSE<br>KELTFKELFLVNAVMMHKGIIHQH | 1.9e-091       | Unknown                |



**Supplementary Table S4: List of primers used for qRT-PCR analysis**

| Sl No | Name        | Primer sequence                 | Annealing temperature (°C) | Product size (bp) |
|-------|-------------|---------------------------------|----------------------------|-------------------|
| 1     | CsAGO1-F    | GGATTTGCACCAATATGATGTTTCAATTAC  | 60                         | 219               |
|       | CsAGO1-R    | CCTGTTCCATCATCTTCATCAATGAGAG    |                            |                   |
| 2     | CsAGO2/3a-F | GAAGCTAAATGCTTACTTACGAGGAATGCTC | 61                         | 161               |
|       | CsAGO2/3a-R | CATAGCCAAGGTCTTCGTTTGGTCTG      |                            |                   |
| 3     | CsAGO2/3d-F | GTTGTTGAAGGAAATGTCGCTGATTC      | 60                         | 249               |
|       | CsAGO2/3d-R | CTCCTGACGAGATTCCAATGACATTTT     |                            |                   |
| 4     | CsAGO5a-F   | GTGAATGAAGAATTTGGTATTCAAGTGAGG  | 60                         | 254               |
|       | CsAGO5a-R   | CTACGACACATAGAAATCAATTCACGGC    |                            |                   |
| 5     | CsAGO6-F    | GAGGAATTTCACTAATGTTGGAGGAGGTG   | 61.3                       | 245               |
|       | CsAGO6-R    | CCATGTTGCTGTGCCTTGTCTTAACC      |                            |                   |
| 6     | CsAGO7-F    | CAGAATAACCCTCTCTGGCTACCTCG      | 61.3                       | 231               |
|       | CsAGO7-R    | GAATTGGACTAGGAAATGATTGGCAAGG    |                            |                   |
| 7     | CsAGO10a-F  | CAACATTAAACTTGTGGATGAAGAGGATGG  | 61.9                       | 231               |
|       | CsAGO10a-R  | GATCTTCCAACAGGGCAGTACCTCTTTG    |                            |                   |
| 8     | CsDCL1b-F   | GGAAATCATTTGGATTTGACTAAACGC     | 59                         | 210               |
|       | CsDCL1b-R   | GTAATCAGCATAAGAGCTGTACTCCAATGG  |                            |                   |
| 9     | CsDCL1a-F   | GCATGTACCAATGCCCTCAGAAATTG      | 60.5                       | 221               |
|       | CsDCL1a-R   | CACCATCACTTTCTGTTCTTTCAGAGACC   |                            |                   |
| 10    | CsDCL2-F    | GAGGTAGACATCCCTATGTTTGCATTATG   | 58                         | 225               |
|       | CsDCL2-R    | GAATGTACTIONGGCTAACACAGATTTCGC  |                            |                   |
| 11    | CsDCL3-F    | CAAATCTTCAAGTGAAGAATACTATGGAGC  | 60                         | 200               |
|       | CsDCL3-R    | GTTACCAAGTAGCACGATGGCATTTCATC   |                            |                   |
| 12    | CsDCL4-F    | GAGCACCAAGAAGATGCTCTGGAGAC      | 60                         | 253               |
|       | CsDCL4-R    | CTCCACACAGGATAAATCAGCTTCAATTC   |                            |                   |
| 13    | CsRDR1a-F   | GATTTCACTCCATTATTCTGCCTTGGTC    | 60                         | 178               |
|       | CsRDR1a-R   | CCACAATGGGTACTAGATCCAAATTGC     |                            |                   |
| 14    | CsRDR1b-F   | GAGAACATCTGGCAGATTGAGCTTCG      | 61                         | 211               |
|       | CsRDR1b-R   | GCTCCAAACATAAAGAAGAAGATTGGCC    |                            |                   |
| 15    | CsRDR5a-F   | GACGATAAAACTTCAAGTCGATCTTGC     | 57                         | 166               |
|       | CsRDR5a-R   | GGGAGCCTTCAATGCAATATCTACTG      |                            |                   |
| 16    | CsRDR5b-F   | CTCTTGCTCCTTGCGATGAGATAGAATC    | 60                         | 227               |
|       | CsRDR5b-R   | CGACCCTCTCAATTCCAGTGATTTCTC     |                            |                   |
| 17    | CsRDR6a-F   | GTGGCTTTTCGATGTTCTTACTGCTTC     | 58                         | 250               |
|       | CsRDR6a-R   | GGACTTGACACTTGAACAAAGCATTG      |                            |                   |
| 18    | CsRDR6b-F   | GCAGATGTGGCGTTTGATGTTCTTAC      | 59                         | 247               |
|       | CsRDR6b-R   | CTTGATAAAGCATTGACCTTGTTTCG      |                            |                   |
| 19    | CsRDR6c-F   | CATCATGTGCTGAGCAAGGAAATGTAG     | 59.6                       | 232               |
|       | CsRDR6c-R   | GAAGGATTGATACTTGGATAAAGCATTG    |                            |                   |
| 20    | 18S rRNA-F* | TCTGCCCGTTGCTCTGATG             | 60                         | 134               |
|       | 18S rRNA-R  | TCACCCGTCACCACCATAG             |                            |                   |

F= Forward and R=Reverse; \*AF207029.1 (Accession No.)
